# Supplementary material for: Polyketides as Secondary Metabolites from the Genus Aspergillus
Source: MDPI journal article supplement (doi:10.3390/jof9020261), 2023-02-15
Supplement: s1 [file s1]

*Supplementary Materials for*

## **Polyketides as Secondary Metabolites from the Genus *Aspergillus***

**Xuelian Bai<sup>1</sup>, Yue Sheng<sup>1</sup>, Zhenxing Tang<sup>2</sup>, Jingyi Pan<sup>1</sup>, Shigui Wang<sup>1</sup>, Bin Tang<sup>1</sup>, Ting Zhou<sup>1</sup>, Lu'e Shi<sup>1</sup>, and Huawei Zhang<sup>3,\*</sup>**

<sup>1</sup>College of Life and Environmental Sciences, Hangzhou Normal University, Hangzhou 311121, China

<sup>2</sup>School of Culinary Arts, Tourism College of Zhejiang, Hangzhou 311231, China

<sup>3</sup>School of Pharmaceutical Sciences, Zhejiang University of Technology, Hangzhou 310014, China

\*Correspondence: hwzhang@zjut.edu.cn; Tel.: +86-571-88320613

**Table S1. Detail information for *Aspergillus*-derived polyketides**

| No. | Name                                                                           | Strain                           | Source                                                             | Biological activity                                                                                                                                                    | Ref.   |
|-----|--------------------------------------------------------------------------------|----------------------------------|--------------------------------------------------------------------|------------------------------------------------------------------------------------------------------------------------------------------------------------------------|--------|
| 1   | pre-Shamixanthone                                                              | <i>A. nidulans</i> FGSCA4        | -                                                                  | significant inhibitory effect on lipid accumulation in HepG2 cells without cytotoxic effects, accompanying the potent reduction of total cholesterol and triglycerides | [1,2]  |
| 2   | 2-(3,5-Dichloro-2,6-dihydroxy-4-methylbenzoyl)-5-hydroxy-3-methoxybenzoic acid | <i>A. terreus</i> C9408-3        | soil of fumaroles from Yangmingshan                                | -                                                                                                                                                                      | [3,4]  |
| 3   | Dihydrogeodin                                                                  | <i>A. terreus</i> C9408-3        | Mountain area (China)                                              | significant inhibitory effect on the isomerase cyclophilin A.                                                                                                          |        |
| 4   | 3,5-Dichlorosulochrin                                                          | <i>A. flavipes</i> PJ03-11       | wetland mud                                                        | stronger $\alpha$ -glucosidase inhibitory activities than acarbose                                                                                                     | [5]    |
| 5   | 3-de-O-methylsulochrin                                                         |                                  |                                                                    |                                                                                                                                                                        |        |
| 6   | 2-(3,5-Dichloro-2,6-dihydroxy-4-methylbenzoyl)-5-hydroxy-3-methoxybenzoic acid |                                  |                                                                    |                                                                                                                                                                        |        |
| 7   | Eurobenzophenone A                                                             | <i>A. europaeus</i> WZXY-SX-4-1  | marine sponge <i>Xestospongia testudinaria</i>                     | -                                                                                                                                                                      | [6]    |
| 8   | Eurobenzophenone B                                                             |                                  |                                                                    | weak inhibitory effects against NO production and the DPPH radical scavenging activity                                                                                 |        |
| 9   | Eurobenzophenone C                                                             |                                  |                                                                    | potent radical scavenging activity against DPPH                                                                                                                        |        |
| 10  | 14-O-Demethylsulochrin                                                         |                                  |                                                                    | -                                                                                                                                                                      |        |
| 11  | 3-de-O-methylsulochrin                                                         |                                  |                                                                    | potent radical scavenging activity against DPPH                                                                                                                        |        |
| 12  | 14-de-Omethyl-5-methoxysulochrin                                               |                                  |                                                                    | -                                                                                                                                                                      |        |
| 13  | Sulochrin                                                                      |                                  |                                                                    | -                                                                                                                                                                      |        |
| 14  | 5-methoxysulochrin                                                             |                                  |                                                                    | -                                                                                                                                                                      |        |
| 15  | Gibellulin C                                                                   | <i>A. nidulans</i> $\Delta$ LaeB |                                                                    |                                                                                                                                                                        | [7]    |
| 16  | Gibellulin D                                                                   |                                  |                                                                    |                                                                                                                                                                        |        |
| 17  | F-9775A                                                                        | <i>A. nidulans</i> RMS011        | -                                                                  | strong inhibitory effect on cathepsin K for treatment of osteoporosis                                                                                                  | [8]    |
| 18  | F-9775B                                                                        |                                  |                                                                    |                                                                                                                                                                        |        |
| 19  | Tetraorcinol A                                                                 | <i>A. versicolor</i> LCJ-5-4     | soft coral <i>Cladiella</i> sp. collected from the South China Sea | weak radical-scavenging activity against the DPPH radical with an IC <sub>50</sub> value of 67 $\mu$ M                                                                 | [9]    |
| 20  | Geodin hydrate                                                                 | <i>A. terreus</i> C9408-3        | soil of fumaroles from Yangmingshan Mountain area                  | inhibitory effect on ET-1 binding to the ETA receptor                                                                                                                  | [3,10] |
| 21  | Methyl-3,5-dichloroasterric acid                                               |                                  |                                                                    | -                                                                                                                                                                      |        |
| 22  | Asterric acid                                                                  |                                  |                                                                    | inhibitory effect on ET-1 binding to the ETA receptor                                                                                                                  |        |
| 23  | 5-hydroxymethylasterric acid                                                   | <i>A. flavipes</i> PJ03-11       | wetland mud                                                        | -                                                                                                                                                                      | [5]    |
| 24  | Neogeodin hydrate                                                              |                                  |                                                                    | -                                                                                                                                                                      |        |
| 25  | 2,4-dichloroasterric acid                                                      |                                  |                                                                    | potent inhibitory effect on $\alpha$ -glucosidase                                                                                                                      |        |
| 26  | Methyl dichloroasterrate                                                       |                                  |                                                                    | -                                                                                                                                                                      |        |
| 27  | Monomethylsoic acid                                                            |                                  |                                                                    | -                                                                                                                                                                      |        |
| 28  | Asterric acid                                                                  |                                  |                                                                    | -                                                                                                                                                                      |        |
| 29  | Methyl 3-chloroasterric acid                                                   |                                  |                                                                    | -                                                                                                                                                                      |        |
| 30  | Methyl chloroasterrate                                                         |                                  |                                                                    | -                                                                                                                                                                      |        |

|    |                                                                                   |                                    |                                                                                        |                                                                                                                                                                      |         |
|----|-----------------------------------------------------------------------------------|------------------------------------|----------------------------------------------------------------------------------------|----------------------------------------------------------------------------------------------------------------------------------------------------------------------|---------|
| 31 | Diorcinol                                                                         | <i>A. flocculus</i>                | stems of the medicinal plant <i>Markhamia platycalyx</i>                               | cytotoxic activity against chronic myelogenous leukemia cell line K562 at 30 $\mu$ M and inhibition the sleeping sickness causing parasite <i>Trypanosoma brucei</i> | [11]    |
| 32 | Asperic acid                                                                      | <i>A. niger</i>                    | Caribbean sponge, <i>Hyrtios proteus</i>                                               | cytotoxic activity against the murine lymphocytic leukemia P388 and a panel of human cancer cell lines                                                               | [12,13] |
| 33 | Asperfuranone                                                                     | <i>A. nidulans</i>                 | -                                                                                      | cytotoxic activity against A549 cells with an IC <sub>50</sub> value of 15.3 $\mu$ M                                                                                 | [14,15] |
| 34 | 2-(20,3-Epoxy-10,30-heptadienyl)-6-hydroxy-5-(3-methyl-2-butenyl)benzaldehyde     | <i>A. glaucus</i> HB1-19           | marine sediment surrounding mangrove roots                                             | strong radical-scavenging activity                                                                                                                                   | [16]    |
| 35 | 2-(20,3-Epoxy-10,30,50-heptatrienyl)-6-hydroxy-5-(3-methyl-2-butenyl)benzaldehyde |                                    |                                                                                        |                                                                                                                                                                      |         |
| 36 | 2,3,4-trimethyl-5,7-dihydroxy-2,3-dihydrobenzofuran                               | <i>A. terreus</i> X3               | soils collected from Sichuan                                                           | no antimicrobial effect                                                                                                                                              | [17]    |
| 37 | Flufuran                                                                          | <i>A. flavus</i> 9643              | -                                                                                      | inhibit the phytopathogen <i>Phytophthora cinnamomi</i> at 0.2 mg/mL                                                                                                 | [18,19] |
| 38 | 3,7-dihydroxy-1,9-dimethyldibenzofuran                                            | <i>A. sydowii</i> SCSIO 41301      | marine sponge <i>Phakellia fusca</i>                                                   | -                                                                                                                                                                    | [20,21] |
| 39 | Asperochratide H                                                                  | <i>A. ochraceus</i>                | deep-sea water of the Northeastern Pacific Ocean                                       | significant cytotoxic effect on BV-2 cell line                                                                                                                       | [22]    |
| 40 | Asperpentinone A                                                                  | <i>Aspergillus</i> sp. SCSIO 41024 | deep-sea sample in the South China Sea                                                 | -                                                                                                                                                                    | [23]    |
| 41 | Asticolorin A                                                                     | <i>A. versicolor</i> MRC 638       | -                                                                                      | -                                                                                                                                                                    | [24,25] |
| 42 | Asticolorin B                                                                     |                                    |                                                                                        |                                                                                                                                                                      |         |
| 43 | Asticolorin C                                                                     |                                    |                                                                                        |                                                                                                                                                                      |         |
| 44 | Penicillic acid                                                                   | <i>A. ochraceus</i>                | marine sponge                                                                          | antibacterial effect on phytopathogens                                                                                                                               | [26,27] |
| 45 | Versicolactone A                                                                  | <i>A. versicolor</i> LCJ-5-4       | soft coral <i>Cladiella</i> sp. collected from the South China Sea                     | excellent cytotoxicity against human pancreatic cancer cells with an IC <sub>50</sub> values of 9.4 $\mu$ M                                                          | [9,28]  |
| 46 | Versicolactone B                                                                  |                                    |                                                                                        |                                                                                                                                                                      |         |
| 47 | Carlosic acid                                                                     | <i>A. niger</i> ATCC1015           | -                                                                                      | -                                                                                                                                                                    | [29]    |
| 48 | Agglomerin F                                                                      |                                    |                                                                                        | -                                                                                                                                                                    |         |
| 49 | Carlosic acid methyl ether                                                        |                                    |                                                                                        | -                                                                                                                                                                    |         |
| 50 | 2-carboxymethyl-3-hexylmaleic acid anhydride                                      | <i>A. tubingensis</i> OY907        | Mediterranean marine sponge <i>Ircinia variabilis</i>                                  | inhibitory effect on <i>Neurospora crassa</i> (MIC = 207 $\mu$ M)                                                                                                    | [30]    |
| 51 | Aspiketolactonol                                                                  | <i>Aspergillus</i> sp. 16-02-1     | deep-sea sediment sample collected at Lau Basin hydrothermal vent in southwest Pacific | cytotoxic activity against human cancer K562, HL-60, HeLa, and BGC-823 cell lines                                                                                    | [31]    |
| 52 | Aspilactonol A                                                                    |                                    |                                                                                        |                                                                                                                                                                      |         |
| 53 | Aspilactonol B                                                                    |                                    |                                                                                        |                                                                                                                                                                      |         |
| 54 | Aspilactonol C                                                                    |                                    |                                                                                        |                                                                                                                                                                      |         |
| 55 | Aspilactonol D                                                                    |                                    |                                                                                        |                                                                                                                                                                      |         |

|    |                                                  |                                    |                                                                              |                                                                                                                                                                             |         |
|----|--------------------------------------------------|------------------------------------|------------------------------------------------------------------------------|-----------------------------------------------------------------------------------------------------------------------------------------------------------------------------|---------|
| 56 | Aspilactonol E                                   |                                    | Ocean                                                                        |                                                                                                                                                                             |         |
| 57 | Aspilactonol F                                   |                                    |                                                                              |                                                                                                                                                                             |         |
| 58 | (S)-2-(2'-hydroxyethyl)-4-methyl-γ-butyrolactone |                                    |                                                                              |                                                                                                                                                                             |         |
| 59 | Asperochrin B                                    | <i>A. ochraceus</i> MA-15          | rhizospheric soil of marine mangrove plant <i>Bruguiera gymnorrhiza</i>      | -                                                                                                                                                                           | [32]    |
| 60 | Penicillic acid                                  |                                    |                                                                              | antibacterial activity against <i>Aeromonas hydrophilia</i> , <i>Vibrio anguillarum</i> , and <i>V. harveyi</i> with IC <sub>50</sub> values ranging from 0.5 to 32.0 µg/mL |         |
| 61 | Chlorohydroasperlactone A                        |                                    |                                                                              | -                                                                                                                                                                           |         |
| 62 | Chlorohydroasperlactone B                        | <i>Aspergillus</i> sp. OUCMDZ-1583 | marine sponge XD10410 from the Xisha Islands (China)                         | inhibitory effect on α-glucosidase with an IC <sub>50</sub> value of 2.36 mM                                                                                                | [33]    |
| 63 | Aspergone A                                      |                                    |                                                                              | inhibitory effect on α-glucosidase with an IC <sub>50</sub> value of 1.65 mM                                                                                                |         |
| 64 | Aspergone B                                      |                                    |                                                                              | -                                                                                                                                                                           |         |
| 65 | Aspergone C                                      |                                    |                                                                              | -                                                                                                                                                                           |         |
| 66 | Aspergone D                                      | <i>A. flocculus</i>                | stems of the medicinal plant <i>Markhamia platycalyx</i>                     | -                                                                                                                                                                           | [11]    |
| 67 | Dihydropenicillic acid                           |                                    |                                                                              | -                                                                                                                                                                           |         |
| 68 | Asperochratide F                                 | <i>A. ochraceus</i>                | deep-sea water of the Northeastern Pacific Ocean                             | strong cytotoxic effects on BV-2 cell line                                                                                                                                  | [22]    |
| 69 | Gregation B                                      | <i>A. flavus</i>                   | -                                                                            | antibacterial activity against <i>E. coli</i> ATCC 25922                                                                                                                    | [18,34] |
| 70 | Avenaciolide                                     | <i>A. avenaceus</i> G. Smith       | -                                                                            | inhibitory effect on the transport of glutamate in rat liver mitochondria and the ability of ADP to stimulate the rate of glutamate oxidation                               | [35]    |
| 71 | Citrifuran A                                     | <i>Aspergillus</i> sp.             | intestines of centipedes                                                     | moderate inhibitory activities against LPS-induced NO production in RAW 264.7 macrophages with IC <sub>50</sub> values of 18.3, 22.6, and 25.3 µM, respectively             | [36]    |
| 72 | Citrifuran B                                     |                                    |                                                                              | -                                                                                                                                                                           |         |
| 73 | Citrifuran C                                     |                                    |                                                                              | -                                                                                                                                                                           |         |
| 74 | Citrifuran D                                     |                                    |                                                                              | showed significant nitric oxide (NO) inhibition in lipopolysaccharide (LPS)-induced RAW 264.7 macrophage cells, and exhibited IC <sub>50</sub> values of 16.0 µM.           | [37]    |
| 75 | Asperone A                                       |                                    |                                                                              | -                                                                                                                                                                           |         |
| 76 | Asperone B                                       | <i>A. melleus</i> CMI 49108        | -                                                                            | inhibitory effect on superoxide anion                                                                                                                                       | [38,39] |
| 77 | Asperlactone                                     | <i>A. ochraceus</i>                | marine sponge                                                                | -                                                                                                                                                                           | [36]    |
| 78 | Chlorocarolide A                                 |                                    |                                                                              | -                                                                                                                                                                           |         |
| 79 | Chlorocarolide B                                 | <i>Aspergillus</i> sp. SF-5044     | inter-tidal sediment sample collected from the Dadaepo Beach, Busan, (Korea) | -                                                                                                                                                                           | [40]    |
| 80 | Protulactone A                                   |                                    |                                                                              | -                                                                                                                                                                           |         |
| 81 | Tubingenic anhydride A                           | <i>A. tubingensis</i> OY907        | marine sponge <i>Ircinia</i>                                                 | inhibitory effect on <i>Neurospora crassa</i> growth with a MIC                                                                                                             | [30]    |

|     |                                            |                                                            |                                                                                |                                                                                                                                                                                                          |           |
|-----|--------------------------------------------|------------------------------------------------------------|--------------------------------------------------------------------------------|----------------------------------------------------------------------------------------------------------------------------------------------------------------------------------------------------------|-----------|
|     |                                            |                                                            | <i>variabilis</i>                                                              | value of 330 $\mu$ M                                                                                                                                                                                     |           |
| 82  | Asperochrin A                              | <i>A. ochraceus</i> MA-15                                  | rhizospheric soil of marine mangrove plant <i>Bruguiera gymnorrhiza</i> .      | antibacterial activity against <i>Aeromonas hydrophila</i> , <i>Vibrio anguillarum</i> and <i>V. harveyi</i>                                                                                             | [38]      |
| 83  | Aspergone E                                | <i>Aspergillus</i> sp. OUCMDZ-1583                         | marine sponge XD10410 from the Xisha Islands (China)                           | inhibitory effect on $\alpha$ -glucosidase with an IC <sub>50</sub> value of 1.30 mM                                                                                                                     | [33]      |
| 84  | Aspergone F                                |                                                            |                                                                                | -                                                                                                                                                                                                        |           |
| 85  | Allahabadolactone A                        | <i>A. allahabadii</i> BCC45335                             | root of <i>Cinnamomum subavenium</i> Miq. at Khao Yai National Park (Thailand) | cytotoxicity against NCI-H187 and Vero cell lines with IC <sub>50</sub> values of 17.78 and 31.50 $\mu$ g/mL, respectively                                                                               | [41]      |
| 86  | Allahabadolactone B                        |                                                            |                                                                                | anti- <i>B. cereus</i> with an IC <sub>50</sub> value of 12.50 $\mu$ g/mL and cytotoxicity against NCI-H187 and Vero cell lines with IC <sub>50</sub> values of 30.51 and 21.00 $\mu$ g/mL, respectively |           |
| 87  | Asperone C                                 | <i>Aspergillus</i> sp.                                     | intestines of centipedes                                                       | significant nitric oxide (NO) inhibition in lipopolysaccharide (LPS)-induced RAW 264.7 macrophage cells                                                                                                  | [37]      |
| 88  | Asperone D                                 |                                                            |                                                                                | -                                                                                                                                                                                                        |           |
| 89  | Asperone E                                 |                                                            |                                                                                | -                                                                                                                                                                                                        |           |
| 90  | Asperochratide A                           | <i>A. ochraceus</i>                                        | deep-sea water of the Northeastern Pacific Ocean                               | -                                                                                                                                                                                                        | [22]      |
| 91  | Asperochratide B                           |                                                            |                                                                                | -                                                                                                                                                                                                        |           |
| 92  | Asperochratide C                           |                                                            |                                                                                | -                                                                                                                                                                                                        |           |
| 93  | Asperochratide D                           |                                                            |                                                                                | -                                                                                                                                                                                                        |           |
| 94  | Asperochratide E                           |                                                            |                                                                                | strong cytotoxic effect on BV-2 cell line                                                                                                                                                                |           |
| 95  | Asperochratide F                           |                                                            |                                                                                | -                                                                                                                                                                                                        |           |
| 96  | (+)-geodin                                 | <i>P. glabrum</i> AJ117540<br><i>A. terreus</i> ATCC 20542 | -                                                                              | stimulated glucose uptake by rat adipocytes                                                                                                                                                              | [42,43]   |
| 97  | Asperetide                                 | <i>Aspergillus</i> sp. TJ23                                | leaves of the traditional Chinese plant <i>Hypericum perforatum</i> Linn.      | -                                                                                                                                                                                                        | [44]      |
| 98  | (5)-3-butyl-7-methoxyphthalide             |                                                            |                                                                                | -                                                                                                                                                                                                        |           |
| 99  | Porriolide                                 | <i>A. nidulans</i>                                         | -                                                                              | inhibitory effect on the root elongation of both lettuce and stone-leek seedlings by 53.3% and 48.5%, respectively                                                                                       | [7,45,46] |
| 100 | 3-methoxyporriolide                        |                                                            |                                                                                | antifungal activities against <i>Fusarium graminearum</i> , <i>Botrytis cinerea</i> and <i>Phytophthora nicotianae</i> with MIC values of 3.1, 25 and 6.3 $\mu$ g/mL, respectively                       |           |
| 101 | 7-methoxyporriolide                        |                                                            |                                                                                | -                                                                                                                                                                                                        |           |
| 102 | (-)-(R)-mellein                            | <i>A. ochraceus</i>                                        | Indo-Pacific sponge <i>Jaspis coriacea</i>                                     | a broad spectrum of antifungal and antioomycetes activities                                                                                                                                              | [49]      |
| 103 | Botryoisocoumarin A (a racemate)           | <i>A. ochraceus</i> MA-15                                  | rhizospheric soil of marine mangrove plant <i>Bruguiera</i>                    | -                                                                                                                                                                                                        | [32]      |
| 104 | (3 <i>R</i> ,4 <i>S</i> )-4-hydroxymellein |                                                            |                                                                                | -                                                                                                                                                                                                        |           |
| 105 | (3 <i>R</i> ,4 <i>R</i> )-4-hydroxymellein |                                                            |                                                                                | -                                                                                                                                                                                                        |           |

|     |                                            |                                       |                                                                                    |                                                                                                                                                                                                                               |            |
|-----|--------------------------------------------|---------------------------------------|------------------------------------------------------------------------------------|-------------------------------------------------------------------------------------------------------------------------------------------------------------------------------------------------------------------------------|------------|
| 106 | (R)-7-hydroxymellein                       |                                       | <i>gymnorrhiza</i>                                                                 | antibacterial activity against aquatic pathogens <i>Aeromonas hydrophila</i> , <i>Vibrio anguillarum</i> and <i>V. harveyi</i>                                                                                                |            |
| 107 | 6-O-demethylmonocerin                      | <i>Aspergillus</i> sp. OUCMDZ-1583    | marine sponge XD10410 from the Xisha Islands (China)                               | inhibitory effect on $\alpha$ -glucosidase with an IC <sub>50</sub> value of 0.027 mM and influenza A (H1N1) virus with an IC <sub>50</sub> value of 172.4 $\mu$ M                                                            | [33]       |
| 108 | 7-O-demethylmonocerin                      |                                       |                                                                                    | -                                                                                                                                                                                                                             |            |
| 109 | (+)-monocerin                              |                                       |                                                                                    | inhibitory effect on $\alpha$ -glucosidase with an IC <sub>50</sub> value of 1.65 mM and influenza A (H1N1) virus with an IC <sub>50</sub> value of 175.5 $\mu$ M                                                             |            |
| 110 | fusarentin 6-methyl ether                  |                                       |                                                                                    | inhibitory effect on $\alpha$ -glucosidase with an IC <sub>50</sub> value of 1.19 mM                                                                                                                                          |            |
| 111 | 6,7-O-dimethyl-4R-hydroxy-10-epifusarentin |                                       |                                                                                    | inhibitory effect on $\alpha$ -glucosidase with an IC <sub>50</sub> value of 1.74 mM                                                                                                                                          |            |
| 112 | (3S)-5-hydroxymellein                      | <i>Aspergillus</i> sp. SCSIO XWS03F03 | marine sponge collected from the sea area Xuwen County, Guangdong Province (China) | -                                                                                                                                                                                                                             | [50,51]    |
| 113 | Aflatoxin B1                               | <i>A. flavus</i>                      | -                                                                                  | strong toxicity                                                                                                                                                                                                               | [18,52,53] |
| 114 | Aflatoxin G1                               |                                       | -                                                                                  |                                                                                                                                                                                                                               |            |
| 115 | Aflatoxin B2                               |                                       | -                                                                                  |                                                                                                                                                                                                                               |            |
| 116 | Botryoisocoumarin A                        | <i>A. flocculus</i>                   | stems of the medicinal plant <i>Markhamia platycalyx</i>                           | inhibited the growth of chronic myelogenous leukemia cell line K562 at 30 $\mu$ M                                                                                                                                             | [11]       |
| 117 | Mullein                                    |                                       |                                                                                    | -                                                                                                                                                                                                                             |            |
| 118 | cis-4-hydroxymellein                       |                                       |                                                                                    | -                                                                                                                                                                                                                             |            |
| 119 | trans-4-hydroxymellein                     |                                       |                                                                                    | -                                                                                                                                                                                                                             |            |
| 120 | 3-hydroxymellein                           |                                       |                                                                                    | exhibited a respective inhibition of 56% to the sleeping sickness causing parasite <i>Trypanosoma brucei</i>                                                                                                                  |            |
| 121 | 5-hydroxymellein                           |                                       |                                                                                    | inhibited the growth of chronic myelogenous leukemia cell line K562 at 30 $\mu$ M                                                                                                                                             |            |
| 122 | 4,5-dihydroxymellein                       |                                       |                                                                                    | -                                                                                                                                                                                                                             |            |
| 123 | (S)-6,8-dimethoxy-3-methylisochroman-1-one | <i>A. terreus</i> SCSIO 41008         | Marine sponge <i>Callyspongia</i> sp.                                              | exhibited no cytotoxic activities towards human glioma U87 cells at a concentration of 10 $\mu$ mol/L and showed no protective activity against glutamate-induced toxicity in HT22 cells at a concentration of 10 $\mu$ mol/L | [54]       |
| 124 | Alternariol 9-O-methyl ether               | <i>A. fumigatus</i> D                 | coastal plant <i>Edgeworthia chrysantha</i> Lindl.                                 | no antimicrobial activity                                                                                                                                                                                                     | [55]       |
| 125 | Asperjinone                                | <i>A. terreus</i> C9408-3             | soil of fumaroles from Yangmingshan                                                | -                                                                                                                                                                                                                             | [3,56-58]  |
| 126 | Butyrolactone I                            |                                       |                                                                                    | mild cytotoxic activity                                                                                                                                                                                                       |            |

|     |                                                                     |                                |                                                                                       |                                                                                                                                                                                                                         |         |
|-----|---------------------------------------------------------------------|--------------------------------|---------------------------------------------------------------------------------------|-------------------------------------------------------------------------------------------------------------------------------------------------------------------------------------------------------------------------|---------|
| 127 | Butyrolactone IV                                                    |                                | Mountain area (China)                                                                 |                                                                                                                                                                                                                         |         |
| 128 | Butyrolactone V                                                     |                                |                                                                                       | antiplasmodial activity against <i>Plasmodium falciparum</i> K1 with an IC <sub>50</sub> value of 7.9 µg/mL                                                                                                             |         |
| 129 | Aspulvinone P                                                       | <i>A. flavipes</i> PJ03-11     | wetland mud                                                                           | stronger $\alpha$ -glucosidase inhibitory effect than acarbose                                                                                                                                                          | [5]     |
| 130 | Aspulvinone Q                                                       |                                |                                                                                       |                                                                                                                                                                                                                         |         |
| 131 | MethybutyrolactoneIII                                               |                                |                                                                                       |                                                                                                                                                                                                                         |         |
| 132 | Flavipes in B                                                       |                                |                                                                                       |                                                                                                                                                                                                                         |         |
| 133 | Butyrolactone II                                                    |                                |                                                                                       |                                                                                                                                                                                                                         |         |
| 134 | Microperfurane                                                      | <i>A. nidulans</i>             | -                                                                                     | -                                                                                                                                                                                                                       | [10,59] |
| 135 | Aspergillolide                                                      | <i>A. carneus</i> L03          | fresh and healthy potato tissue collected from Lincang, Yunnan Province, China        | moderate antifungal activity against plant pathogens and inhibitory effect on nitric oxide production in lipopolysaccharide-stimulated RAW264.7 cells with IC <sub>50</sub> values of 13.36 and 30.16 µM, respectively. | [60]    |
| 136 | (±)-asperteretal D                                                  |                                |                                                                                       |                                                                                                                                                                                                                         |         |
| 137 | Isotorachrysone                                                     | <i>A. glaucus</i>              | marine sediments surrounding mangrove roots collected in the Fujian Province, (China) | no cytotoxicity at 100 µM against the HL-60 and A-549 cell lines                                                                                                                                                        | [61]    |
| 138 | Isotorachrysone-6-O-R-D-ribofuranoside                              |                                |                                                                                       |                                                                                                                                                                                                                         |         |
| 139 | 8-methoxy-3-methyl-1-naphthalenol-6-O-R-D-ribofuranoside            |                                |                                                                                       |                                                                                                                                                                                                                         |         |
| 140 | 8-methoxy-1-naphthalenol-6-O- $\alpha$ -R-D-ribofuranoside          |                                |                                                                                       |                                                                                                                                                                                                                         |         |
| 141 | Asperflavin                                                         |                                |                                                                                       |                                                                                                                                                                                                                         |         |
| 142 | Isoasperflavin                                                      | <i>A. nidulans</i> RJMP1.49    | -                                                                                     | -                                                                                                                                                                                                                       | [62]    |
| 143 | Neosartoricin B                                                     |                                |                                                                                       | -                                                                                                                                                                                                                       |         |
| 144 | Neosartoricin C                                                     |                                |                                                                                       | -                                                                                                                                                                                                                       |         |
| 145 | Neosartoricin D                                                     | <i>A. niger</i> FGSC A1279     | -                                                                                     | -                                                                                                                                                                                                                       | [63]    |
| 146 | Funalenone                                                          |                                |                                                                                       | inhibitory effect on types I and IV collagenases                                                                                                                                                                        |         |
| 147 | Methyl 6-acetyl-4-methoxy-5,7,8-trihydroxynaphthalene-2-carboxylate | <i>A. terreus</i> SCSIO 41008. | marine sponge <i>Callyspongia</i> sp.                                                 | weak or no cytotoxic activities towards human glioma U87 cells and weak or no protective activity against glutamate-induced toxicity in HT22 cells                                                                      | [54]    |
| 148 | Methyl 6-acetyl-4-methoxy-5, 8-dihydroxynaphthalene-2-carboxy -late |                                |                                                                                       |                                                                                                                                                                                                                         |         |
| 149 | Orsellinic acid                                                     | <i>A. nidulans</i> RMS011      | -                                                                                     | cytotoxic activity toward HepG2 and CCF cell lines                                                                                                                                                                      | [64,65] |
| 150 | Lecanoric acid                                                      |                                |                                                                                       | -                                                                                                                                                                                                                       |         |
| 151 | 2,4-Dihydroxy-6-((R)-4-hydroxy-2-oxopentyl)-3methylbenzaldehyde     | <i>A. versicolor</i>           | marine sponge <i>Petrosia</i> sp.                                                     | no cytotoxicity against cell lines A-549, SK-OV-3, SK-MEL-2, XF498 or HCT-15                                                                                                                                            | [66]    |
| 152 | Aspergentisyl A                                                     | <i>A. glaucus</i> HB1-19       | marine sediment surrounding mangrove roots                                            | strong radical-scavenging activity                                                                                                                                                                                      | [16]    |
| 153 | Aspergentisyl B                                                     |                                |                                                                                       |                                                                                                                                                                                                                         |         |
| 154 | Dihydroauroglaucin                                                  |                                |                                                                                       |                                                                                                                                                                                                                         |         |
| 155 | Tetrahydroauroglaucin                                               |                                |                                                                                       |                                                                                                                                                                                                                         |         |
| 156 | Isodihydroauroglaucin                                               |                                |                                                                                       |                                                                                                                                                                                                                         |         |
| 157 | Flavoglaucin                                                        |                                |                                                                                       |                                                                                                                                                                                                                         |         |
| 158 | Auroglaucin                                                         | <i>A. fumigatus</i> AF3-093A   | the brown alga <i>Fucus</i>                                                           | antimicrobial effect on <i>S. aureus</i> , methicillin-resistant <i>S.</i>                                                                                                                                              | [67]    |
| 159 | Flavipin                                                            |                                |                                                                                       |                                                                                                                                                                                                                         |         |

|     |                                                                                      |                                    |                                                                                              |                                                                                                                                |            |
|-----|--------------------------------------------------------------------------------------|------------------------------------|----------------------------------------------------------------------------------------------|--------------------------------------------------------------------------------------------------------------------------------|------------|
|     |                                                                                      |                                    | <i>vesiculosus</i>                                                                           | <i>aureus</i> and <i>Mycobacterium tuberculosis</i> H37Ra                                                                      |            |
| 160 | Porosuphenol A                                                                       | <i>A. porosus</i> G23              | Biovitica                                                                                    | no activity was observed for antifungal, antimalaria, antitubercular, antioxidant, and metal-chelating activity (>50 $\mu$ M). | [68]       |
| 161 | Porosuphenol B                                                                       |                                    |                                                                                              |                                                                                                                                |            |
| 162 | (a) Porosuphenol C<br>(b) Porosuphenol D                                             |                                    |                                                                                              |                                                                                                                                |            |
| 163 | Hydroxysydonic acid                                                                  | <i>A. flavus</i> 9643              | -                                                                                            | inhibitory effect on NO production in LPS-stimulated BV2 cells with IC <sub>50</sub> values in 76.5 $\mu$ M                    | [69,70]    |
| 164 | Versicolorin B                                                                       | <i>Aspergillus</i> sp. F40         | marine sponge <i>Callyspongia</i> sp.                                                        | moderate activities against <i>S. aureus</i> and methicillin-resistant <i>S. aureus</i>                                        | [71,72]    |
| 165 | Methyl 2-(4-hydroxyphenyl) acetate                                                   | <i>A. flocculus</i>                | stems of the medicinal plant <i>Markhamia platycalyx</i>                                     | -                                                                                                                              | [11]       |
| 166 | (a) 2-hydroxyphenyl acetic acid<br>(b) 4-hydroxyphenyl acetic acid                   |                                    |                                                                                              | -                                                                                                                              |            |
| 167 | <i>p</i> -hydroxybenzaldehyde                                                        |                                    |                                                                                              | -                                                                                                                              |            |
| 168 | Aspergillusene D                                                                     | <i>A. sydowii</i> SCSIO 41301      | marine sponge <i>Phakellia fusca</i>                                                         | -                                                                                                                              | [21,73,74] |
| 169 | 3-(2,5-Dimethylbenzo[ <i>d</i> ][1,3]dioxol-2-yl)propanoic acid                      |                                    |                                                                                              |                                                                                                                                |            |
| 170 | 2-(5-Hydroxy-4-methylpentyl)-2-methylbenzo[ <i>d</i> ][1,3]dioxole-5-carboxylic acid |                                    |                                                                                              |                                                                                                                                |            |
| 171 | Sydonic acid                                                                         |                                    |                                                                                              |                                                                                                                                |            |
| 172 | ( <i>E</i> )-7-deoxy-7,8-didehydroxydonic acid                                       |                                    |                                                                                              |                                                                                                                                |            |
| 173 | ( <i>Z</i> )-7-deoxy-7,8-didehydroxydonic acid                                       |                                    |                                                                                              |                                                                                                                                |            |
| 174 | 7-deoxy-7,14-didehydroxydonic acid                                                   |                                    |                                                                                              |                                                                                                                                |            |
| 175 | (+)-12hydroxysydonic acid                                                            |                                    |                                                                                              |                                                                                                                                |            |
| 176 | 3,4-dihydroxy-phenylacetic acid methyl ester                                         | <i>Aspergillus</i> sp. SCSIO 41024 | deep-sea sample in the South China Sea                                                       | strong free-radical-scavenging activity                                                                                        | [23,75]    |
| 177 | Fumagillin                                                                           | <i>Aspergillus</i> sp.             | -                                                                                            | antibacterial activity against <i>Staphylococcus aureus</i>                                                                    | [76]       |
| 178 | Aspinonene                                                                           | <i>A. ochraceus</i> FH-A6692       | -                                                                                            | -                                                                                                                              | [77]       |
| 179 | Aspinotriol A                                                                        | <i>A. ostianus</i> 01F313          | an unidentified marine sponge collected in Pohnpei                                           | cytotoxic effects on cell lines K562, HL-60, HeLa and BGC-823                                                                  | [44,78]    |
| 180 | Aspinotriol B                                                                        |                                    |                                                                                              |                                                                                                                                |            |
| 181 | Aspinonediol                                                                         |                                    |                                                                                              |                                                                                                                                |            |
| 182 | Epiaspinonediol                                                                      | <i>Aspergillus</i> sp. 16-02-1     | deep-sea sediment sample collected at Lau Basin hydrothermal vent in southwest Pacific Ocean | exhibited weak antitumor effect on K562, HL-60, HeLa, and BGC-823 cell lines but no anti-MRSA activity                         | [33]       |
| 183 | Aspergone I                                                                          | <i>Aspergillus</i> sp. OUCMDZ-1583 | marine sponge XD10410 from the                                                               | -                                                                                                                              |            |
| 184 | Aspergone J                                                                          |                                    |                                                                                              | inhibitory effect on $\alpha$ -glucosidase with an IC <sub>50</sub> value of 2.37                                              |            |



|     |                                                                    |                                |                                                                                              |                                                                                                                                                                  |      |
|-----|--------------------------------------------------------------------|--------------------------------|----------------------------------------------------------------------------------------------|------------------------------------------------------------------------------------------------------------------------------------------------------------------|------|
|     |                                                                    |                                | Xisha Islands (China)                                                                        | mM                                                                                                                                                               |      |
| 185 | Aspergone K                                                        |                                |                                                                                              | inhibitory effect on $\alpha$ -glucosidase with an IC <sub>50</sub> value of 2.70 mM                                                                             |      |
| 186 | Aspergone L                                                        |                                |                                                                                              | -                                                                                                                                                                |      |
| 187 | Aspergone M                                                        |                                |                                                                                              | -                                                                                                                                                                |      |
| 188 | (-) palitantin                                                     | <i>A. fumigatiaffnis</i>       | endophytic fungus from a medicinal plant <i>Tribulus terrestris</i>                          | antimicrobial effect on multi-resistant clinical isolates of <i>Enterococcus faecalis</i> and <i>Streptococcus pneumoniae</i> with a MIC value of 64 $\mu$ g/mL. | [79] |
| 189 | Azanigerone A                                                      | <i>A. niger</i> ATCC 1015      | Agricultural Research Service (ARS) culture collection                                       | -                                                                                                                                                                | [80] |
| 190 | Azanigerone B                                                      |                                |                                                                                              |                                                                                                                                                                  |      |
| 191 | Azanigerone C                                                      |                                |                                                                                              |                                                                                                                                                                  |      |
| 192 | Azanigerone E                                                      |                                |                                                                                              |                                                                                                                                                                  |      |
| 193 | Azanigerone F                                                      |                                |                                                                                              |                                                                                                                                                                  |      |
| 194 | Citrinin                                                           | <i>A. terreus</i> ATCC 20542   | -                                                                                            | protective effect on iron-induced lipid peroxidation and neuroprotective property                                                                                | [81] |
| 195 | 3 <i>R</i> ,4 <i>S</i> -3,8-Dimethoxy-3-methylisochromane-4,6-diol | <i>A. fumigatus</i>            | endophytic fungus isolated from <i>Cordyceps sinensis</i>                                    | inhibitory activity against the MV4-11 cell line <i>in vitro</i> with an IC <sub>50</sub> value of 23.95 $\mu$ M                                                 | [82] |
| 196 | 3 <i>R</i> ,4 <i>R</i> -3,8-Dimethoxy-3-methylisochromane-4,6-diol |                                |                                                                                              | -                                                                                                                                                                |      |
| 197 | 3 <i>S</i> ,4 <i>R</i> -3,8-Dimethoxy-3-methylisochromane-4,6-diol |                                |                                                                                              | inhibitory activity against the MV4-11 cell line <i>in vitro</i> with an IC <sub>50</sub> value of 32.70 $\mu$ M                                                 |      |
| 198 | 3 <i>R</i> ,4 <i>S</i> -3,8-Dimethoxy-3-methylisochromane-4,6-diol |                                |                                                                                              | -                                                                                                                                                                |      |
| 199 | 3,6,8-Trimethoxy-3-methylisochromane                               |                                |                                                                                              | -                                                                                                                                                                |      |
| 200 | Asperochratide I                                                   | <i>A. ochraceus</i>            | deep-sea water of the Northeastern Pacific Ocean                                             | no cytotoxic, anti-food allergic, anti-H1N1 virus and anti-inflammatory activities                                                                               | [22] |
| 201 | Asperochratide J                                                   |                                |                                                                                              |                                                                                                                                                                  |      |
| 202 | Protulactone B                                                     | <i>Aspergillus</i> sp. SF-5044 | inter-tidal sediment sample collected from the Dadaepo Beach, Busan, (Korea)                 | -                                                                                                                                                                | [40] |
| 203 | Chaetoquadrin F                                                    | <i>Aspergillus</i> sp. 16-02-1 | deep-sea sediment sample collected at Lau Basin hydrothermal vent in southwest Pacific Ocean | antitumor activity against HeLa with IR% values 13.5% at 100 $\mu$ g/mL                                                                                          | [31] |
| 204 | Asperochrin C                                                      | <i>A. ochraceus</i> MA-15      | rhizospheric soil of marine mangrove plant <i>Bruguiera gymnorrhiza</i>                      | -                                                                                                                                                                | [32] |
| 205 | Chlorohydroaspyrone A                                              |                                |                                                                                              | inhibitory activity against aquatic pathogenic bacterial <i>Aeromonas hydrophila</i> , <i>Vibrio anguillarum</i> , and <i>V. harveyi</i> .                       |      |
| 206 | Chlorohydroaspyrone B                                              |                                |                                                                                              | -                                                                                                                                                                |      |
| 207 | Dihydroaspyrone                                                    |                                |                                                                                              | -                                                                                                                                                                |      |
| 208 | Aspyronol                                                          |                                |                                                                                              | -                                                                                                                                                                |      |

|     |                                  |                                       |                                                                                    |                                                                                                                                                               |            |
|-----|----------------------------------|---------------------------------------|------------------------------------------------------------------------------------|---------------------------------------------------------------------------------------------------------------------------------------------------------------|------------|
| 209 | 12,13-Dihydroxymagnaporthepyrone | <i>A. oryzae</i> M-2-3                | rice blast fungus                                                                  | -                                                                                                                                                             | [83]       |
| 210 | 10,11-Dihydroxymagnaporthepyrone |                                       |                                                                                    | -                                                                                                                                                             |            |
| 211 | (+)-asperlin                     | <i>A. nidulans</i> mutant             | -                                                                                  | anti-inflammatory, antitumor and antibiotic activity                                                                                                          | [84]       |
| 212 | Nigerpyrone                      | <i>A. niger</i> FGSC A1279            | -                                                                                  | -                                                                                                                                                             | [85]       |
| 213 | Aspopyrone A                     | <i>Aspergillus</i> sp. TMPU1623       | a root part of an Okinawan plant                                                   | strong inhibitory effect on protein tyrosine phosphatase (PTP) 1B with an IC <sub>50</sub> value of 6.7 $\mu$ M                                               | [86]       |
| 214 | Dihydroaspyrone                  | <i>A. flocculus</i>                   | stem of the medicinal plant <i>Markhamia platycalyx</i>                            | -                                                                                                                                                             | [11]       |
| 215 | Kojic acid                       |                                       |                                                                                    | weak antibacterial activities against <i>Bacillus thuringiensis</i> and <i>Acinetobacter baumannii</i> with MIC values of 32 and 128 $\mu$ g/mL, respectively |            |
| 216 | 7-O-acetyl kojic acid            |                                       |                                                                                    | -                                                                                                                                                             |            |
| 217 | 4-hydroxy-3,6-dimethyl-2pyrone   | <i>A. sydowii</i> SCSIO 41301         | marine sponge <i>Phakellia fusca</i>                                               | -                                                                                                                                                             | [21]       |
| 218 | 4-methyl-5,6-dihydropyren-2-one  |                                       |                                                                                    |                                                                                                                                                               |            |
| 219 | Phomapyrone C                    | <i>Aspergillus</i> sp. SCSIO 41024    | deep-sea sediments in the South China Sea                                          | -                                                                                                                                                             | [23]       |
| 220 | Aspergchromone A                 | <i>Aspergillus</i> sp. SCSIO XWS03F03 | marine sponge collected from the sea area Xuwen County, Guangdong Province (China) | -                                                                                                                                                             | [50]       |
| 221 | Aspergchromone B                 |                                       |                                                                                    |                                                                                                                                                               |            |
| 222 | Noreugenin                       |                                       |                                                                                    |                                                                                                                                                               |            |
| 223 | Aurasperone A                    | <i>A. niger</i> FGSC A1279            | -                                                                                  | toxic activity against brine shrimp with a LD <sub>50</sub> value of 9 ppm                                                                                    | [85,87]    |
| 224 | Fonsecinone D                    |                                       |                                                                                    | -                                                                                                                                                             |            |
| 225 | Rubrofusarin B                   | <i>A. fumigatus</i> D                 | coastal plant <i>Edgeworthia chrysantha</i> Lindl.                                 | no potent antimicrobial activity against <i>E. coli</i> , <i>S. aureus</i> and <i>C. albicans</i>                                                             | [55]       |
| 226 | Asperpyrone A                    |                                       |                                                                                    |                                                                                                                                                               |            |
| 227 | Asperpyrone D                    |                                       |                                                                                    |                                                                                                                                                               |            |
| 228 | Fonsecinone B                    |                                       |                                                                                    |                                                                                                                                                               |            |
| 229 | Fonsecinone A                    |                                       |                                                                                    |                                                                                                                                                               |            |
| 230 | Aspergiolide A                   | <i>A. glaucus</i> HB1-19              | marine sediment surrounding mangrove roots                                         | selective cytotoxicities against A-549, HL-60, BEL-7402, and P388 cell lines                                                                                  | [61,88,89] |
| 231 | Aspergiolide B                   |                                       |                                                                                    | potent cytotoxicities against the HL-60 and A-549 cell lines with IC <sub>50</sub> values of 0.51 and 0.24 $\mu$ M, respectively.                             |            |
| 232 | Emodin                           |                                       |                                                                                    | -                                                                                                                                                             |            |
| 233 | Physcion                         |                                       |                                                                                    | -                                                                                                                                                             |            |
| 234 | Questin                          |                                       |                                                                                    | -                                                                                                                                                             |            |
| 235 | Catenarin                        |                                       |                                                                                    | -                                                                                                                                                             |            |
| 236 | Rubrocristin                     |                                       |                                                                                    | -                                                                                                                                                             |            |
| 237 | Physcion bianthrone              |                                       |                                                                                    | -                                                                                                                                                             |            |

|     |                                        |                          |                                                      |                                                                                                                                                                                                    |      |
|-----|----------------------------------------|--------------------------|------------------------------------------------------|----------------------------------------------------------------------------------------------------------------------------------------------------------------------------------------------------|------|
| 238 | (trans)-emodin-physcion bianthrone     |                          |                                                      | moderate cytotoxicities against HL-60 and A-549 cell lines with IC <sub>50</sub> values of 7.8 and 9.2 μM, respectively.                                                                           |      |
| 239 | (cis)-emodin-physcion bianthrone       |                          |                                                      | cytotoxic effect on HL-60 and A-549 cell lines with IC <sub>50</sub> values 44.0 and 14.2 μM, respectively                                                                                         |      |
| 240 | (+)-variecolorquinone A                |                          |                                                      | -                                                                                                                                                                                                  |      |
| 241 | Aspergiolide C                         |                          |                                                      | strong inhibitory effect on tyrosine kinases (RTKs) c-Met, Ron, and c-Src with low-micromolar IC <sub>50</sub> s                                                                                   |      |
| 242 | Aspergiolide D                         |                          |                                                      |                                                                                                                                                                                                    |      |
| 243 | Averantin                              | A. versicolor            | marine sponge Petrosia sp.                           | significant cytotoxicity against tumor cell lines (A-549, SK-OV-3, SK-MEL-2, XF-498, and HCT-15) with IC <sub>50</sub> values in the range of 0.41-4.61 μg/mL                                      | [66] |
| 244 | Methyl-averantin                       |                          |                                                      | -                                                                                                                                                                                                  |      |
| 245 | Averufin                               |                          |                                                      | antibacterial activity against clinically isolated Gram-positive strains with MIC values of 6.25 μg/mL.                                                                                            |      |
| 246 | Nidurufin                              |                          |                                                      | weak antimicrobial activity against V. parahaemolyticus with a MIC value of 12 μg/mL.                                                                                                              |      |
| 247 | Versiconol                             |                          |                                                      |                                                                                                                                                                                                    |      |
| 248 | Sanghaspirocin A                       | A. nidulans              | -                                                    | moderate antibiotic activity against Gram-positive bacteria and good antiproliferative effect on human leukaemia and endothelial as well as cytotoxicity against human cervix carcinoma cell lines | [90] |
| 249 | Sanghaspirocin B                       |                          |                                                      |                                                                                                                                                                                                    |      |
| 250 | 2ω-dihydroxyemodin                     | A. nidulans FGSCA4       | -                                                    | -                                                                                                                                                                                                  | [91] |
| 251 | Chrysophanol                           |                          |                                                      | -                                                                                                                                                                                                  |      |
| 252 | ω-hydroxyemodin-5-methyl ether         | A. terreus C9408-3       | soil of fumaroles from Yangmingshan Mountain (China) | -                                                                                                                                                                                                  | [3]  |
| 253 | ω-acetylcarviolin                      |                          |                                                      | -                                                                                                                                                                                                  |      |
| 254 | Dermolutein                            | A. europaeus WZXY-SX-4-1 | marine sponge Xestospongia testudinaria              | remarked down-regulation of NF-κB in LPS-induced SW480 cells with weak inhibitory effects against NO production and the DPPH radical scavenging activity                                           | [6]  |
| 255 | Methylemodin                           |                          |                                                      | -                                                                                                                                                                                                  |      |
| 256 | (+)-1-O-demethylvariecolorquinones A   |                          |                                                      | -                                                                                                                                                                                                  |      |
| 257 | 1-methoxy-14-dehydroxywentiquinone C   |                          |                                                      | -                                                                                                                                                                                                  |      |
| 258 | Wentiquinone C                         |                          |                                                      | -                                                                                                                                                                                                  |      |
| 259 | Asperthecin                            | A. nidulans              | -                                                    | potent aggregation inhibitory effect                                                                                                                                                               | [92] |
| 260 | Versiconol B                           | Aspergillus sp. F40      | marine sponge Callyspongia sp.                       | weak antimicrobial activity against S. aureus and V. parahaemolyticus with MIC values of 48 μg/mL and 24 μg/mL, respectively.                                                                      | [71] |
| 261 | Dihydrosterigmatocystin                |                          |                                                      | -                                                                                                                                                                                                  |      |
| 262 | Secosterigmatocystin                   |                          |                                                      | -                                                                                                                                                                                                  |      |
| 263 | 1,6,8-trihydroxy-3-methylanthraquinone | A. sydowii SCSIO 41301   | marine sponge Phakellia fusca                        | -                                                                                                                                                                                                  | [21] |
| 264 | Emodic acid                            |                          |                                                      | broad inhibitory activities against three influenza A virus subtypes A/Puerto Rico/8/34 (H1N1), A/Aichi/2/68 (H3N2) and A/ FM-1/1/47 (H1N1), respectively                                          |      |
| 265 | Parietinic acid                        |                          |                                                      |                                                                                                                                                                                                    |      |

|     |                                                       |                                                                                                          |                                                                                                                           |                                                                                                                                                                                                                               |             |
|-----|-------------------------------------------------------|----------------------------------------------------------------------------------------------------------|---------------------------------------------------------------------------------------------------------------------------|-------------------------------------------------------------------------------------------------------------------------------------------------------------------------------------------------------------------------------|-------------|
| 266 | 1,8-dihydroxy-3-methoxy-6-methylanthracene-9,10-dione | <i>A. terreus</i> SCSIO 41008                                                                            | marine sponge<br><i>Callyspongia</i> sp.                                                                                  | weak or no cytotoxic activities towards human glioma U87 cells and weak or no protective activity against glutamate-induced toxicity in HT22 cells at 10 $\mu$ M                                                              | [54]        |
| 267 | 1-methyl emodin                                       |                                                                                                          |                                                                                                                           |                                                                                                                                                                                                                               |             |
| 268 | 8-di-O-methylaverufin                                 | <i>A. versicolor</i> HBU-2017-7                                                                          | Bohai Sea (China)                                                                                                         | -                                                                                                                                                                                                                             | [93]        |
| 269 | 1'-O-methylaverantin                                  |                                                                                                          |                                                                                                                           |                                                                                                                                                                                                                               |             |
| 270 | Spinulosin                                            | <i>A. flavus</i>                                                                                         | -                                                                                                                         | effective nematocidal activity against <i>B. xylophilus</i> without any plant growth inhibition                                                                                                                               | [18,94,95]  |
| 271 | Terreic acid                                          | <i>A. terreus</i> ATCC 20542                                                                             | -                                                                                                                         | inhibitory effect on Bruton's tyrosine kinase                                                                                                                                                                                 | [42,96]     |
| 272 | Phomaligol A                                          | <i>A. flocculus</i>                                                                                      | stem of the medicinal plant <i>Markhamia platycalyx</i>                                                                   | -                                                                                                                                                                                                                             | [11]        |
| 273 | Phomaligol A1                                         |                                                                                                          |                                                                                                                           |                                                                                                                                                                                                                               |             |
| 274 | Csypyrone B1                                          | <i>A. oryzae</i> M-2-3                                                                                   | -                                                                                                                         | -                                                                                                                                                                                                                             | [97]        |
| 275 | Aspergiodiquinone                                     | <i>A. glaucus</i> HB1-19                                                                                 | marine sediment surrounding mangrove roots                                                                                | -                                                                                                                                                                                                                             | [16]        |
| 276 | (4S)-6-hydroxyisoscлерone                             | <i>Aspergillus</i> sp. SCSIO XWS03F03                                                                    | sponge collected from the sea area Xuwen County, Guangdong Province(China)                                                | -                                                                                                                                                                                                                             | [50,98]     |
| 277 | (-)-regiolone                                         |                                                                                                          |                                                                                                                           |                                                                                                                                                                                                                               |             |
| 278 | Ergosterol                                            | <i>Aspergillus</i> sp. TJ23                                                                              | fresh leaves of the traditional Chinese plant <i>Hypericum perforatum</i> L                                               | inhibitory activities against five cancer cell lines (B16, MDA-MB-231, 4T1, HepG2, and LLC) with IC <sub>50</sub> values ranging from 5.13 to 12.3 $\mu$ M.                                                                   | [48]        |
| 279 | Ergosterol peroxide                                   | <i>A. flocculus</i>                                                                                      | Stem of the medicinal plant <i>Markhamia platycalyx</i>                                                                   | inhibitory effect on the migration of MDA-MB-231 cells at concentrations lower than 20 $\mu$ M.                                                                                                                               | [11,99,100] |
| 280 | Campesterol                                           |                                                                                                          |                                                                                                                           | -                                                                                                                                                                                                                             |             |
| 281 | steroid                                               | <i>Aspergillus</i> sp. SCSIO 41017                                                                       | deep-sea sample in the South China Sea                                                                                    | moderate activity against brain cancer cell line (SF-268), breast cancer cell line (MCF-7), human liver cancer cell line (HepG-2) and human lung carcinoma cell line (A549) with IC <sub>50</sub> values of 13.5-18.0 $\mu$ M | [101]       |
| 282 | Terretonin                                            | <i>A. terreus</i>                                                                                        | -                                                                                                                         | -                                                                                                                                                                                                                             | [102]       |
| 283 | Fumicycline A                                         | Cocultivation of a strain of <i>A. fumigatus</i> with the actinomycete <i>Streptomyces rapamycinicus</i> | the soil-derived bacterium <i>Streptomyces rapamycinicus</i> and the human pathogenic fungus <i>Aspergillus fumigatus</i> | -                                                                                                                                                                                                                             | [103]       |
| 284 | Fumicycline B                                         |                                                                                                          |                                                                                                                           |                                                                                                                                                                                                                               |             |
| 285 | Parasiticolide A                                      | <i>A. flavus</i> and <i>A. parasiticus</i> IFO 4082                                                      | -                                                                                                                         | -                                                                                                                                                                                                                             | [18,104]    |
| 286 | Spiroaspertrione A                                    | <i>Aspergillus</i> sp. TJ23                                                                              | fresh leaves of the                                                                                                       | antibacterial toward MRSA with a MIC value of 4 $\mu$ g/mL                                                                                                                                                                    | [105]       |

|     |                           |                                                      |                                                                                 |                                                                                                                                                                                                                           |          |
|-----|---------------------------|------------------------------------------------------|---------------------------------------------------------------------------------|---------------------------------------------------------------------------------------------------------------------------------------------------------------------------------------------------------------------------|----------|
| 287 | Aspermerodione            |                                                      | traditional Chinese plant <i>Hypericum perforatum</i> L                         | potential inhibitor of PBP2a and synergistically with the $\beta$ -lactam antibiotics oxacillin and piperacillin against MRSA. weak antimicrobial activity                                                                | [106]    |
| 288 | Andiconin C               |                                                      |                                                                                 |                                                                                                                                                                                                                           |          |
| 289 | Sphaeropsidin A           | <i>A. porosus</i> G23                                | marine-derived endophyte                                                        | selective cytotoxicity toward melanoma and kidney cancer cell lines with a unique mechanism of action targeting regulatory volume increase.                                                                               | [68,107] |
| 290 | Aspergiloid E             |                                                      |                                                                                 | -                                                                                                                                                                                                                         |          |
| 291 | Arugosin C                | <i>A. versicolor</i> HBU-2017-7                      | Bohai Sea (China)                                                               | -                                                                                                                                                                                                                         | [93,108] |
| 292 | Chlovalicin               | <i>A. niger</i> BRF-074                              | sediments collected in the Northeast coast of Brazil                            | no cytotoxicity towards the HCT-116 cell line                                                                                                                                                                             | [109]    |
| 293 | Sterigmatocystin          | <i>A. versicolor</i>                                 | marine sponge <i>Petrosia</i> sp.                                               | significant cytotoxicity against five human solid tumor cell lines (A-549, SK-OV-3, SK-MEL-2, XF-498, and HCT-15) with IC <sub>50</sub> values in the range of 0.41-4.61 $\mu$ g/mL.                                      | [66,71]  |
| 294 | Dihydrosterigmatocystin   |                                                      |                                                                                 | -                                                                                                                                                                                                                         |          |
| 295 | 5-methoxysterigmatocystin | <i>A. versicolor</i> HBU-2017-7                      | Bohai Sea (China)                                                               | inhibitory effect on <i>Staphylococcus aureus</i> , <i>Bacillus subtilis</i> , <i>Pseudomonas aeruginosa</i> , <i>Escherichia coli</i> , and <i>Candida albicans</i> is weak.                                             | [93]     |
| 296 | Shamixanthone             | <i>A. nidulans</i> FGSCA4                            | -                                                                               | moderate activities and was selective against gastric carcinoma, colon carcinoma, and breast carcinoma.                                                                                                                   | [110]    |
| 297 | Secalonic acid D          | <i>A. Aculeatus</i><br><i>A. sp.</i> SCSIO XWS03F03  | unidentified sponge<br>-                                                        | moderate antimicrobial activity against <i>Staphylococcus aureus</i> ATCC 29213 and <i>Mycobacterium tuberculosis</i> with IC <sub>50</sub> values of 7.19 and 1.26 $\mu$ M, respectively.                                | [50,111] |
| 298 | Secalonic acid F          | <i>A. Aculeatus</i><br><i>A. aculeatus</i> IBT 21030 | -                                                                               | -                                                                                                                                                                                                                         |          |
| 299 | Penicitrinone A           | <i>A. terreus</i> X3                                 | soil fungus collected from Sichuan (China)                                      | moderate activity against Gram-positive bacterium <i>B. megaterium</i> with a MIC value of 1.60 $\mu$ M and moderate activity against Gram-negative bacterium <i>V. parahemolyticus</i> with a MIC value of 25.0 $\mu$ M. | [17]     |
| 300 | Penicitrinone B           |                                                      |                                                                                 | moderate activity against Gram-negative bacterium <i>Vibrio anguillarum</i> with a MIC value of 12.5 $\mu$ M                                                                                                              |          |
| 301 | Asperanthon               | <i>Aspergillus</i> sp. TJ23                          | fresh leaves of the traditional Chinese plant <i>Hypericum perforatum</i> Linn. | inhibitory activity against HepG2 with an IC <sub>50</sub> value of 35.5 $\mu$ M                                                                                                                                          | [44]     |
| 302 | Ruguloxanthone C          |                                                      |                                                                                 | inhibitory activities against the growth of B16, HepG2, and LLC cancer cell lines with IC <sub>50</sub> values of 35.6, 29.5 and 32.7 $\mu$ M, respectively                                                               |          |
| 303 | Tajixanthone hydrate      |                                                      |                                                                                 | inhibitory activity against HepG2 with an IC <sub>50</sub> value of 36.8 $\mu$ M                                                                                                                                          |          |
| 304 | Tajixanthone methanoate   |                                                      |                                                                                 | -                                                                                                                                                                                                                         |          |

|     |                                                                     |                                    |                                                                                     |                                                                                                                                                                                                   |            |
|-----|---------------------------------------------------------------------|------------------------------------|-------------------------------------------------------------------------------------|---------------------------------------------------------------------------------------------------------------------------------------------------------------------------------------------------|------------|
| 305 | Euroxanthone A                                                      | <i>A. europaeus</i> WZXY-SX-4-1    | marine sponge<br><i>Xestospongia testudinaria</i>                                   | strong down-regulation of NF-κB in LPS-induced SW480 cells with weak inhibitory effects against NO production and the DPPH radical scavenging activity                                            | [6,71]     |
| 306 | Euroxanthone B                                                      |                                    |                                                                                     | -                                                                                                                                                                                                 |            |
| 307 | Calyxanthone                                                        |                                    |                                                                                     | -                                                                                                                                                                                                 |            |
| 308 | Yicathin C                                                          |                                    |                                                                                     | -                                                                                                                                                                                                 |            |
| 309 | Yicathin A                                                          |                                    |                                                                                     | -                                                                                                                                                                                                 |            |
| 310 | Yicathin B                                                          | <i>Aspergillus</i> sp. F40         | sponge <i>Calyspongia</i> sp.                                                       | strong down-regulation of NF-κB in LPS-induced SW480 cells with weak inhibitory effects against NO production and the DPPH radical scavenging activity                                            | [71]       |
| 311 | Oxisterigmatocystin I                                               |                                    |                                                                                     | -                                                                                                                                                                                                 |            |
| 312 | Oxisterigmatocystin C                                               |                                    |                                                                                     | weak antimicrobial activity against <i>S. aureus</i> with an MIC value of 48 µg/mL                                                                                                                |            |
| 313 | Sydowic acid                                                        |                                    |                                                                                     | -                                                                                                                                                                                                 |            |
| 314 | Averufin                                                            |                                    |                                                                                     | -                                                                                                                                                                                                 |            |
| 315 | 2-Hydroxy-1-(hydroxymethyl)-8-methoxy-3-methyl-9H-xanthen-9-one     | <i>A. sydowii</i> SCSIO 41301      | sponge <i>Phakelliafusca</i>                                                        | selective inhibitory activities against two influenza A virus subtypes, A/Puerto Rico/8/34 (H1N1) and A/FM-1/1/47 (H1N1), with IC <sub>50</sub> values ranging from 2.17 ± 1.39 to 4.70 ± 1.11 µM | [21]       |
| 316 | 2-Hydroxy-1-(hydroxymethyl)-7,8-dimethoxy-3-methyl-9H-xanthen-9-one |                                    |                                                                                     |                                                                                                                                                                                                   |            |
| 317 | Mevinolin                                                           | <i>A. terreus</i> ATCC 20542       | soil isolation program at the CEPA Laboratories                                     | potent inhibitory effect on hydroxymethylglutaryl-coenzyme A reductase                                                                                                                            | [112]      |
| 318 | Mevinolinic acid                                                    |                                    |                                                                                     | -                                                                                                                                                                                                 |            |
| 319 | Aspermytin A                                                        | <i>Aspergillus</i> sp.             | marine mussel, <i>Mytilus edulis</i>                                                | significant neurotrophic effect on the rat pheochromocytoma (PC-12) cells                                                                                                                         | [113]      |
| 320 | Decumbenone C                                                       | <i>A. sulphureus</i> KMM 4640      | marine sediments                                                                    | significant cytotoxicity against melanoma cell lines but not against colorectal cancer                                                                                                            | [114, 115] |
| 321 | Decumbenone A                                                       |                                    |                                                                                     |                                                                                                                                                                                                   |            |
| 322 | Decumbenone B                                                       |                                    |                                                                                     |                                                                                                                                                                                                   |            |
| 323 | Calbistrin A                                                        | <i>A. aculeatus</i> IBT 21030      | -                                                                                   | antifungal activity, nerve growth factor-increasing and cholesterol-lowering effects                                                                                                              | [116,117]  |
| 324 | Calbistrin C                                                        |                                    |                                                                                     | -                                                                                                                                                                                                 |            |
| 325 | Versicorin                                                          | <i>A. versicolor</i> SC0156        | a soil sample collected in the Dinghu Mountain Biosphere Reserve, Guangdong (China) | no bacterial inhibition at 50 µM or cytotoxicity at 100 µM                                                                                                                                        | [118]      |
| 326 | Versiol                                                             |                                    |                                                                                     |                                                                                                                                                                                                   |            |
| 327 | Aspergone N                                                         | <i>Aspergillus</i> sp. OUCMDZ-1583 | marine sponge XD10410 from the Xisha Islands of                                     | $\alpha$ -glucosidase inhibition with an IC <sub>50</sub> value of 1.36 mM.                                                                                                                       | [33,44]    |
| 328 | Aspergone O                                                         |                                    |                                                                                     | $\alpha$ -glucosidase inhibition with an IC <sub>50</sub> value of 1.54 mM.                                                                                                                       |            |
| 329 | Aspergone P                                                         |                                    |                                                                                     | $\alpha$ -glucosidase inhibition with an IC <sub>50</sub> value of 2.21 mM.                                                                                                                       |            |

|     |                                |                                    |                                                                                   |                                                                                                                                                                                                                                         |               |
|-----|--------------------------------|------------------------------------|-----------------------------------------------------------------------------------|-----------------------------------------------------------------------------------------------------------------------------------------------------------------------------------------------------------------------------------------|---------------|
| 330 | Aspergone Q                    |                                    | China                                                                             | $\alpha$ -glucosidase inhibition with an IC <sub>50</sub> value of 2.26 mM.                                                                                                                                                             |               |
| 331 | Epoxyquinol                    |                                    |                                                                                   | -                                                                                                                                                                                                                                       |               |
| 332 | Salimyxin B                    | <i>A. sp.</i> TJ23                 | endophytic fungus isolated from the medicinal plant <i>Hypericum perforatum</i> L | cytotoxic effect on HepG2 with an IC <sub>50</sub> value of 9.87 $\mu$ M.                                                                                                                                                               | [44]          |
| 333 | Hexylitaconic acid             | <i>A. niger</i>                    | Caribbean sponge, <i>Hyrtios proteus</i>                                          | inhibitory effect on p53–HDM2 interaction, and antibacterial activities against <i>E. coli</i> , <i>Micrococcus luteus</i> , <i>Pseudomonas agarici</i> and <i>S. warneri</i> with MIC values ranging between 0.29 and 0.58 $\mu$ g/mL. | [29, 119,120] |
| 334 | Terrain- $\alpha$ -D-glucoside | <i>Aspergillus sp.</i> PF1381      | soil sample collected in Hachijo Island, Tokyo, Japan                             | inhibited angiogenin secretion from androgen-dependent prostate cancer cell line LNCaP-CR with an IC <sub>50</sub> value of 13 $\mu$ M                                                                                                  | [121]         |
| 335 | Aspercyclide A                 | <i>Aspergillus sp.</i> MF6215      | soil sample collected in Olduvai Gorge                                            | inhibitory effect on the IgE binding to its receptor with an IC <sub>50</sub> value of 200 $\mu$ M.                                                                                                                                     | [122]         |
| 336 | Aspercyclide B                 |                                    |                                                                                   | -                                                                                                                                                                                                                                       |               |
| 337 | Aspercyclide C                 |                                    |                                                                                   | -                                                                                                                                                                                                                                       |               |
| 338 | Aculene C                      | <i>A. aculeatus</i> IBT 21030      | -                                                                                 | weak or no activity against <i>Candida albicans</i> .                                                                                                                                                                                   | [116]         |
| 339 | Aculene D                      |                                    |                                                                                   |                                                                                                                                                                                                                                         |               |
| 340 | Dehydrocurvularin              | <i>A. terreus</i> ATCC 20542       | -                                                                                 | anti-cancer activity in a glioma stem cell-based orthotopic xenograft model in mice                                                                                                                                                     | [47,123,124]  |
| 341 | Aspergone G                    | <i>Aspergillus sp.</i> OUCMDZ-1583 | marine sponge XD10410 collected from Xisha Islands (China)                        | -                                                                                                                                                                                                                                       | [33]          |
| 342 | Aspergone H                    |                                    |                                                                                   |                                                                                                                                                                                                                                         |               |
| 343 | Terrain                        | <i>A. flavus</i>                   | -                                                                                 | strong cytotoxicity against breast cancer MCF-7 cells                                                                                                                                                                                   | [3,18]        |

## References

- Sarkara, A.; Funka, A.N.; Scherlach, K.; Horn, F.; Schroeckh, V.; Chankhamjon, P.; Westermann, M.; Roth, M.; Brakhage, A.A.; Hertweck, C.; et al. Differential expression of silent polyketide biosynthesis gene clusters in chemostat cultures of *Aspergillus nidulans*. *J. Biotechnol.* **2012**, *160*, 64-71. [10.1016/j.jbiotec.2012.01.015]
- Wu, Q.; Wu, C.M.; Long, H.L.; Chen, R.; Liu, D.; Proksch, P.; Guo, P.; Lin, W.H. Varioxiranols A-G and 19-o-methyl-22-methoxy-pre-shamixanthone, PKS and hybrid PKS-derived metabolites from a sponge-associated *Emericella variecolor* fungus. *J. Nat. Prod.* **2015**, *78*, 2461-2470. [10.1021/acs.jnatprod.5b00578]
- Liao, W.Y.; Shen, C.N.; Lin, L.H.; Yang, Y.L.; Han, H.Y.; Chen, J.W.; Kuo, S.C.; Wu, S.H.; Liaw, C.C. Asperjinone, a nor-neolignan, and terrein, a suppressor of ABCG2-expressing breast cancer cells, from thermophilic *Aspergillus terreus*. *J. Nat. Prod.* **2012**, *75*, 630-635. [10.1021/np200866z]
- Hamed, A.; Ismail, M.; Shaaban, M. X-ray, structural assignment and molecular docking study of dihydrogeodin from *Aspergillus terreus* TM8. *Nat. Prod. Res.* **2019**, *33*, 117-121. [10.1080/14786419.2018.1431642]

5. Zhang, L.H.; Feng, B.M.; Zhao, Y.Q.; Sun, Y.; Liu, B.; Liu, F.; Chen, G.; Bai, J.; Hua, H.M.; Wang, H.F. Polyketide butenolide, diphenyl ether, and benzophenone derivatives from the fungus *Aspergillus flavipes* PJ03-11. *Bioorg. Med. Chem. Lett.* **2016**, *26*, 346-350. [10.1016/j.bmcl.2015.12.009]
6. Du, X.W.; Liu, D.; Huang, J.; Zhang, C.J.; Proksch, P.; Lin, W.H. Polyketide derivatives from the sponge associated fungus *Aspergillus europaeus* with antioxidant and NO inhibitory activities. *Fitoterapia* **2018**, *130*, 190-197. [10.1016/j.fitote.2018.08.030]
7. Lin, H.; Lyu, H.N.; Zhou, S.; Yu, J.W.; Keller, N.P.; Chen, L.; Yin, W.B. Deletion of a global regulator *LaeB* leads to the discovery of novel polyketides in *Aspergillus nidulans*. *Org. Biomol. Chem.* **2018**, *16*, 4973-4976. [10.1039/c8ob01326h]
8. Schroeckh, V.; Scherlach, K.; Nutzmans, H.W.; Shelest, E.; Schmidt-Heck, W.; Schuemann, J.; Martin, K.; Hertweck, C.; Brakhage, A.A. Intimate bacterial-fungal interaction triggers biosynthesis of archetypal polyketides in *Aspergillus nidulans*. *Proc. Natl. Acad. Sci. U S A.* **2009**, *106*, 14558-14563. [10.1073/pnas.0901870106]
9. Zhuang, Y.B.; Teng, X.C.; Wang, Y.; Liu, P.P.; Wang, H.; Li, J.; Li, G.Q.; Zhu, W.M. Cyclopeptides and polyketides from coral-associated fungus, *Aspergillus versicolor* LCJ-5-4. *Tetrahedron* **2011**, *67*, 7085-7089. [10.1016/j.tet.2011.07.003]
10. Ohashi, H.; Akiyama, H.; Nishikori, K.; Mochizuki, J. Asterric acid, a new endothelin binding inhibitor. *J. Antibiot.* **1992**, *45*, 1684-1685. [10.7164/antibiotics.45.1684]
11. Tawfike, A.F.; Romli, M.; Clements, C.; Abbott, G.; Young, L.; Schumacher, M.; Diederich, M.; Farag, M.; Edrada-Ebel, R. Isolation of anticancer and anti-trypanosome secondary metabolites from the endophytic fungus *Aspergillus flocculus* via bioactivity guided isolation and MS based metabolomics. *J. Chromatogr. B.* **2019**, *1106-1107*, 71-83. [10.1016/j.jchromb.2018.12.032]
12. Varoglu, M.; Crews, P. Biosynthetically diverse compounds from a saltwater culture of sponge-derived *Aspergillus niger*. *J. Nat. Prod.* **2000**, *63*, 41-43. [10.1021/np9902892]
13. Pettit, G.R.; Du, J.; Pettit, R.K.; Knight, J.C.; Doubek, D.L. Antineoplastic agents. 575. the fungus *Aspergillus phoenicis*. *Heterocycles* **2009**, *79*, 909-916. [10.3987/COM-08-S(D)63]
14. Chiang, Y.M.; Szewczyk, E.; Davidson, A.D.; Keller, N.; Oakley, B.R.; Wang, C.C.C. A gene cluster containing two fungal polyketide synthases encodes the biosynthetic pathway for a polyketide, asperfuranone, in *Aspergillus nidulans*. *J. Am. Chem. Soc.* **2009**, *131*, 2965-2970. [10.1021/ja8088185]
15. Wang, C.C.C.; Chiang, Y.M.; Praseuth, M.B.; Kuo, P.L.; Liang, H.L.; Hsu, Y.L. Asperfuranone from *Aspergillus nidulans* inhibits proliferation of human non-small cell lung cancer A549 cells via blocking cell cycle progression and inducing apoptosis. *Basic Clin. Pharmacol.* **2010**, *107*, 583-589. [10.1111/j.1742-7843.2010.00545.x]
16. Sun, S.W.; Ji, C.Z.; Gu, Q.Q.; Li, D.H.; Zhut, T.J. Three new polyketides from marine-derived fungus *Aspergillus glaucus* HB1-19. *J. Asian Nat. Prod. Res.* **2013**, *15*, 956-961. [10.1080/10286020.2013.826205]
17. Xu, L.L.; Cao, F.; Tian, S.S.; Zhu, H.J. Alkaloids and polyketides from the soil fungus *Aspergillus terreus* and their antibacterial activities. *Chem. Nat. Compd.* **2017**, *53*, 1212-1215. [10.1007/s10600-017-2243-5]
18. Saldan, N.C.; Almeida, R.T.R.; Avicola, A.; Porto, C.; Galuch, M.B.; Magon, T.F.S.; Pilau, E.J.; Svidzinski, T.I.E.; Oliveira, C.C. Development of an analytical method for identification of *Aspergillus flavus* based on chemical markers using HPLC-MS. *Food Chem.* **2018**, *241*, 113-121. [10.1016/j.foodchem.2017.08.065]
19. Evidente, A.; Cristinzio, G.; Punzo, B.; Andolfi, A.; Testa, A.; Melck, D. Flufuran, an antifungal 3,5-disubstituted furan produced by *Aspergillus flavus* link. *Chem. Biodivers.* **2009**, *6*, 328-334. [10.1002/cbdv.200800292]
20. Tanahashi, T.; Takenaka, Y.; Nagakura, N.; Hamada, N. Dibenzofurans from the cultured lichen mycobionts of *Lecanora cinereocarnea*. *Phytochemistry* **2001**, *58*, 1129-1134. [10.1016/S0031-9422(01)00394-6]
21. Liu, N.Z.; Peng, S.; Yang, J.; Cong, Z.W.; Lin, X.P.; Liao, S.R.; Yang, B.; Zhou, X.F.; Zhou, X.J.; Liu, Y.H.; et al. Structurally diverse sesquiterpenoids and polyketides from a sponge-associated fungus *Aspergillus sydowii* SCSIO41301. *Fitoterapia* **2019**, *135*, 27-32. [10.1016/j.fitote.2019.03.031]
22. Zou, Z.B.; Zou, Z.B.; Zhang, G.; Li, S.M.; He, Z.H.; Yan, Q.X.; Lin, Y.K.; Xie, C.L.; Xia, J.M.; Luo, Z.H.; Luo, L.Z.; et al. Asperochratides A-J, Ten new polyketides from the deep-sea-derived *Aspergillus ochraceus*. *Bioorg. Chem.* **2020**, *105*, 104349. [10.1016/j.bioorg.2020.104349]
23. Chen, W.H.; Liu, H.Y.; Long, J.Y.; Tao, H.M.; Lin, X.P.; Liao, S.R.; Yang, B.; Zhou, X.F.; Liu, Y.H.; Wang, J.F.; et al. Asperpentenone A, a novel polyketide isolated from the deep-sea derived fungus *Aspergillus* sp. SCSIO 41024. *Phytochem. Lett.* **2020**, *35*, 99-102. [10.1016/j.phytol.2019.11.009]



24. Steyn, P.S.; Vleggaar, R.; Simpson, T.J. Stable isotope labelling studies on the biosynthesis of asticolorin C by *Aspergillus multicolor*. Evidence for a symmetrical intermediate. *J. Chem. Soc., Chem. Commun.* **1984**, 12, 765-767. [10.1039/C39840000765]
25. Rabie, C.J.; Simpson, T.J.; Steyn, P.S.; van Rooyen, P.H.; Vleggaar, R. Structure and absolute configuration of the asticolorins, toxic metabolites from *Aspergillus multicolor*. *J. Chem. Soc., Chem. Commun.* **1984**, 12, 764-765. [10.1039/C39840000764]
26. Abrell, L.M.; Borgeson, B.; Crews, P. Chloro polyketides from the cultured fungus (*Aspergillus*) separated from a marine sponge. *Tetrahedron Lett.* **1996**, 37, 2331-2334. [10.1016/0040-4039(96)00277-8]
27. Nguyen, H.T.; Yu, N.H.; Jeon, S.J.; Lee, H.W.; Bae, C.H.; Yeo, J.H.; Lee, H.B.; Kim, I.S.; Park, H.W.; Kim, J.C. Antibacterial activities of penicillic acid isolated from *Aspergillus persii* against various plant pathogenic bacteria. *Lett. Appl. Microbiol.* **2016**, 62, 488-493. [10.1111/lam.12578]
28. Qi, C.X.; Gao, W.X.; Guan, D.Y.Z.; Wang, J.P.; Liu, M.T.; Chen, C.M.; Zhu, H.C.; Zhou, Y.; Lai, Y.J.; Hu, Z.X.; et al. Butenolides from a marine-derived fungus *Aspergillus terreus* with antitumor activities against pancreatic ductal adenocarcinoma cells. *Bioorg. Med. Chem.* **2018**, 26, 5903-5910. [10.1016/j.bmc.2018.10.040]
29. Yang, X.L.; Awakawa, T.; Wakimoto, T.; Abe, I. Three acyltetronic acid derivatives: noncanonical cryptic polyketides from *Aspergillus niger* identified by genome mining. *Chembiochem.* **2014**, 15, 1578-1583. [10.1002/cbic.201402172]
30. Koch, L.; Lodin, A.; Herold, I.; Ilan, M.; Carmeli, S.; Yarden, O. Sensitivity of *Neurospora crassa* to a marine-derived *Aspergillus tubingensis* anhydride exhibiting antifungal activity that is mediated by the MAS1 protein. *Mar. Drugs* **2014**, 12, 4713-4731. [10.3390/md12094713]
31. Chen, X.W.; Li, C.W.; Cui, C.B.; Hua, W.; Zhu, T.J.; Gu, Q.Q. Nine new and five known polyketides derived from a deep sea-sourced *Aspergillus* sp. 16-02-1. *Mar. Drugs* **2014**, 12, 3116-3137. [10.3390/md12063116]
32. Liu, Y.; Li, X.M.; Meng, L.H.; Wang, B.G. Polyketides from the marine mangrove-derived fungus *Aspergillus ochraceus* MA-15 and their activity against aquatic pathogenic bacteria. *Phytochem. Lett.* **2015**, 12, 232-236. [10.1016/j.phytol.2015.04.009]
33. Kong, F.D.; Zhao, C.Y.; Hao, J.J.; Wang, C.; Wang, W.; Huang, X.L.; Zhu, W.M. New  $\alpha$ -glucosidase inhibitors from a marine sponge-derived fungus, *Aspergillus* sp. OUCMDZ-1583. *RSC Adv.* **2015**, 5, 68852-68863. [10.1039/C5RA11185D]
34. Wijeratne, E.M.K.; Xu, Y.M.; Arnold, A.E.; Gunatilaka, A.A.L. Pulvinulin A, Graminin C, and cis-Gregatin B – new natural furanones from *pulvinula* sp. 11120, a fungal endophyte of cupressus arizonica. *Nat. Prod. Commun.* **2015**, 10, 107-111. [10.1177/1934578X1501000127]
35. Castelo-branco, P.A.; Rubinger, M.M.M.; Alves, L.D.C.; de Barros, P.M.; Pereira, S.G.; de Melo, V.J.; Pilo-Veloso, D.; Zambolim, L. Synthesis and antifungal activity of aromatic bis-gamma-lactones analogous to avenaciolide. *Chem. Biodivers* **2007**, 4, 2745-2754. [10.1002/cbdv.200790223]
36. Yin, G.P.; Wu, Y.R.; Yang, M.H.; Li, T.X.; Wang, X.B.; Zhou, M.M.; Lei, J.L.; Kong, L.Y. Citrifurans A-D, four dimeric aromatic polyketides with new carbon skeletons from the fungus *Aspergillus* sp. *Org. Lett.* **2017**, 19, 4058-4061. [10.1021/acs.orglett.7b01823]
37. Yin, G.P.; Wu, Y.R.; Han, C.; Wang, X.B.; Gao, H.L.; Yin, Y.; Kong, L.Y.; Yang, M.H. Asperones A–E, five dimeric polyketides with new carbon skeletons from the fungus *Aspergillus* sp. AWG 1–15. *Org. Chem. Front.* **2018**, 5, 2432-2436. [10.1039/c8qo00070k]
38. Garson, M.J.; Staunton, J.; Jones, P.G. New polyketide metabolites from *Aspergillus melleus*: structural and stereochemical studies. *J. Chem. Soc. Perk T1* **1984**, 1, 1021-1026. [10.1039/P19840001021]
39. Sakhri, A.; Chaouche, N.K.; Catania, M.R.; Ritieni, A.; Santini, A. Chemical composition of *Aspergillus creber* extract and evaluation of its antimicrobial and antioxidant activities. *Pol. J. Microbiol.* **2019**, 68, 309-316. [10.33073/pjm-2019-033]
40. Sohn, J.H.; Oh, H.C. Protulactones A and B: two new polyketides from the marine-derived fungus *Aspergillus* sp. SF-5044. *B Korean Chem. Soc.* **2010**, 31, 1695-1698. [10.5012/bkcs.2010.31.6.1695]
41. Sadorn, K.; Saepua, S.; Boonyuen, N.; Laksanacharoen, P.; Rachtawee, P.; Prabpai, S.; Kongsaree, P.; Pittayakhajonwut, P. Allahabadolactones A and B from the endophytic fungus, *Aspergillus allahabadii* BCC45335. *Tetrahedron* **2016**, 72, 489-495. [10.1016/j.tet.2015.11.056]

42. Boruta, T.; M. Bizukojc. Culture-based and sequence-based insights into biosynthesis of secondary metabolites by *Aspergillus terreus* ATCC 20542. *J. Biotechnol.* **2014**, 175, 53-62.[10.1016/j.jbiotec.2014.01.038]
43. Sato, S.; Okusa, N.; Ogawa, A.; Ikenoue, T.; Seki, T.; Tsuji, T. Identification and preliminary SAR studies of (+)-geodin as a glucose uptake stimulator for rat adipocytes. *J. Antibiot. (Tokyo)* **2005**, 58, 583-589. [10.1038/ja.2005.79]
44. Qiao, Y.B.; Tu, K.; Feng, W.Y.; Liu, J.J.; Xu, Q.Q.; Tao, L.; Zhu, H.C.; Chen, C.M.; Wang, J.P.; Xue, Y.B.; et al. Polyketide and prenylxanthone derivatives from the endophytic fungus *Aspergillus* sp. TJ23. *Chem. Biodivers.* **2018**, 15, e1800395. [10.1002/cbdv.201800395]
45. Suemitsu, R.; Ohnishi, K.; Horiuchi, M.; Morikawa, Y.; Sakaki, Y.; Matsumoto, Y. Structure of porriolide, a new metabolite from *Alternaria porri*. *Biosci. Biotech. Biochem.* **1993**, 57, 334-335. [10.1271/bbb.57.334]
46. Yang, X.L.; Zhang, S.; Hu, Q.B.; Luo, D.Q.; Zhang, Y. Phthalide derivatives with antifungal activities against the plant pathogens isolated from the liquid culture of *Pestalotiopsis photiniae*. *J. Antibiot. (Tokyo)* **2011**, 64, 723-727. [10.1038/ja.2011.82]
47. Pochet, L.; Frederick, R.; Masereel, B. Coumarin and isocoumarin as serine protease inhibitors. *Curr. Pharm. Design* **2004**, 10, 3781-3796. [10.2174/1381612043382684]
48. Hussain, H.; Green, I. A patent review of two fruitful decades (1997-2016) of isocoumarin research. *Expert Opin. Ther. Pat.* **2017**, 27, 1267-1275. [10.1080/13543776.2017.1344220]
49. Cimmino, A.; Maddau, L.; Masi, M.; Linaldeddu, B.T.; Evidente, A. Secondary metabolites produced by *Sardiniella urbana*, a new emerging pathogen on European hackberry. *Nat. Prod. Res.* **2019**, 33, 1862-1869. [10.1080/14786419.2018.1477154]
50. Wang, Y.; Lin, X.P.; Ju, Z.R.; Liao, X.J.; Huang, X.J.; Zhang, C.; Zhao, B.X.; Xu, S.H. Aspergchromones A and B, two new polyketides from the marine sponge-associated fungus *Aspergillus* sp. SCSIO XWS03F03. *J. Asian Nat. Prod. Res.* **2017**, 19, 684-690. [10.1080/10286020.2016.1231673]
51. Bi, Y.; Bi, X.; Zhao, Q.; Fang, A.; Chen, Y. Dihydroisocoumarins from the fungus *Cephalosporium* sp. AL031. *Pol. J. Chem.* **2006**, 37, 397-401.[10.1002/chin.200630211]
52. Chang, S.B.; ABDEL-KADER, M.M.; WICK, E.L.; WOGAN, G.N. Aflatoxin B2: chemical identity and biological activity. *Science* **1963**, 142, 1191-1192. [10.1126/science.142.3596.1191]
53. Klich, M.A. *Aspergillus flavus*: the major producer of aflatoxin. *Mol. Plant Pathol.* **2007**, 8, 713-722.[10.1111/j.1364-3703.2007.00436.x]
54. Luo, X.W.; Lin, Y.; Lu, Y.J.; Zhou, X.F.; Liu, Y.H. Peptides and polyketides isolated from the marine sponge-derived fungus *Aspergillus terreus* SCSIO 41008. *Chin. J. Nat. Medicines* **2019**, 17, 149-154. [10.1016/S1875-5364(19)30017-2]
55. Hua, Y.; Pan, R.; Bai, X.L.; Wei, B.; Chen, J.W.; Wang, H.; Zhang, H.W. Aromatic polyketides from a symbiotic strain *Aspergillus fumigatus* D and characterization of their biosynthetic gene D8.t287. *Mar. Drugs* **2020**, 18,324. [10.3390/md18060324]
56. Rao, K.V.; Sadhukhan, A.K. ; Veerender, M. ; Ravikumar, V. ; Mohan, E.V.S.; Dhanvantri, S.D. ; Sitaramkumar, M . ; Babu, J.M. ; Vyas, K.; Reddy, G.O. Butyrolactones from *Aspergillus terreus*. *Chem. Pharm. Bull. (Tokyo)* **2000**, 48, 559-562.[10.1248/cpb.48.559]
57. Lin, T.; Lu, C.; Shen, Y. Secondary metabolites of *Aspergillus* sp. F1, a commensal fungal strain of *Trewia nudiflora*. *Nat. Prod. Res.* **2009**, 23, 77-85. [10.1080/14786410701852826]
58. Haritakun, R.; Rachtaewee, P.; Chanthaket, R.; Boonyuen, N.; Isaka, M. Butyrolactones from the fungus *Aspergillus terreus* BCC 4651. *Chem. Pharm. Bull. (Tokyo)* **2010**, 58, 1545-1548.[10.1248/cpb.58.1545]
59. Furukawa, T.; Fukuda, T.; Nagai, K.; Uchida, R.; Tomoda, H. Helvafuranone produced by the fungus *Aspergillus nidulans* BF0142 isolated from hot spring-derived soil. *Nat. Prod. Commun.* **2016**, 11,1001-1003.[10.1177/1934578X1601100733]
60. Zhang, X.; Zhang, F.L.; Wu, X.; Ye, K.; Lv, X.; Ai, H.L.; Liu, J.K. Bioactive polyketides from the potato endophytic fungus *Aspergillus carneus*. *Nat. Prod. Commun.* **2020**, 15,1-5. [10.1177/1934578X20985222]

61. Du, L.; Liu, H.B.; Fang, Y.C.; Zhu, W.M.; Gu, Q.Q. Cytotoxic polyketides from a marine-derived fungus *Aspergillus glaucus*. *J. Nat. Prod.* **2008**, *71*, 1837-1842. [10.1021/np800303t]
62. Yin, W.B.; Chooi, Y.H.; Smith, A.R.; Cacho, R.A.; Hu, Y.C.; White, T.C.; Tang, Y. Discovery of cryptic polyketide metabolites from dermatophytes using heterologous expression in *Aspergillus nidulans*. *ACS Synth. Biol.* **2013**, *2*, 629-634. [10.1021/sb4000 48b]
63. Inokoshi, J.; Shiomi, K.; Masuma, R.; Tanaka, H.; Yamada, H.; Omura, S. Funalenone, a novel collagenase inhibitor produced by *Aspergillus niger*. *J. Antibiot. (Tokyo)* **1999**, *52*, 1095-1100. [10.7164/antibiotics.52.1095]
64. Lunne, F.; Niehaus, E.M.; Lipinski, S.; Kunigkeit, J.; Kalinina, S.A.; Humpf, H.U. Identification of the polyketide synthase PKS7 responsible for the production of lecanoric acid and ethyl lecanorate in *Claviceps purpurea*. *Fungal Genet. Biol.* **2020**, *145*, 103481. [10.1016/j.fgb.2020.103481]
65. Bogo, D.; Matos, M.D.C.; Honda, N.K.; Pontes, E.C.; Oguma, P.M.; Santos, E.C.D.; de Carvalho, J.E.; Nomizo, A. In vitro antitumour activity of orsellinates. *Z Naturforsch. C J. Biosci.* **2010**, *65*, 43-48. [10.1515/znc-2010-1-208]
66. Lee, Y.M.; Li, H.; Hong, J.; Cho, H.Y.; Bae, K.S.; Kim, M.A.; Kim, D.K.; Jung, J.H. Bioactive metabolites from the sponge-derived fungus *Aspergillus versicolor*. *Arch. Pharm. Res.* **2010**, *33*, 231-235. [10.1007/s12272-010-0207-4]
67. Flewelling, A.J.; Bishop, A.I.; Johnson, J.A.; Gray, C.A. Polyketides from an endophytic *Aspergillus fumigatus* isolate inhibit the growth of mycobacterium tuberculosis and MRSA. *Nat. Prod. Commun.* **2015**, *10*, 1661-1662. [10.1177/1934578X1501001009]
68. Neuhaus, G.F.; Adpressa, D.A.; Bruhn, T.; Loesgen, S. Polyketides from marine-derived *Aspergillus porosus*: challenges and opportunities for determining absolute configuration. *J. Nat. Prod.* **2019**, *82*, 2780-2789. [10.1021/acs.jnatprod.9b00416]
69. Hamasaki, T.; Nagayama, K.; Hatsuda, Y. Two new metabolites, sydonic acid and hydroxysydonic acid, from *Aspergillus sydowi*. *Agri. Biol. Chem.* **1978**, *42*, 37-40. [10.1080/00021369.1978.10862919]
70. Quang, T.H.; Phong, N.V.; Hanh, T.T.H.; Cuong, N.X.; Ngan, N.T.T.; Oh, H.; Nam, N.H.; Minh, C.V. Cytotoxic and immunomodulatory phenol derivatives from a marine sponge-derived fungus *Ascomycota* sp. VK12. *Nat. Prod. Res.* **2021**, *35*, 5153-5159. [10.1080/14786419.2020.1786829]
71. Tian, Y.Q.; Lin, S.T.; Kumaravel, K.; Zhou, H.; Wang, S.Y.; Liu, Y.H. Polyketide-derived metabolites from the sponge-derived fungus *Aspergillus* sp. F40. *Phytochem. Lett.* **2018**, *27*, 74-77. [10.1016/j.phytol.2018.06.009]
72. Hu, J.S.; Li, Z.; Gao, J.Y.; He, H.T.; Dai, H.Q.; Xia, X.K.; Liu, C.H.; Zhang, L.X.; Song, F.H. New diketopiperazines from a marine-derived fungus strain *Aspergillus versicolor* MF180151. *Mar. Drugs* **2019**, *17*, e262. [10.3390/md17050262]
73. Kudo, S.; Murakami, T.; Miyanishi, J.; Tanaka, K.; Takada, N.; Hashimoto, M. Isolation and absolute stereochemistry of optically active sydonic acid from *Glonium* sp. (Hysteriales, Ascomycota). *Biosci. Biotech. Bioch.* **2009**, *73*, 203-204. [10.1271/bbb.80535]
74. Wei, M.Y.; Wang, C.Y.; Liu, Q.A.; Shao, C.L.; She, Z.G.; Lin, Y.C. Five sesquiterpenoids from a marine-derived fungus *Aspergillus* sp. isolated from a gorgonian *Dichotella gemmacea*. *Mar. Drugs* **2010**, *8*, 941-949. [10.3390/md8040941]
75. Zhang, Z.Z.; Xiao, B.H.; Chen, Q.; Lian, X.Y. Synthesis and biological evaluation of caffeic acid 3,4-dihydroxyphenethyl ester. *J. Nat. Prod.* **2010**, *73*, 252-254. [10.1021/np900519d]
76. Hanson, F.R.; Eble, T.E. An antiphage agent isolated from *Aspergillus* Sp. *J. Bacteriol.* **1949**, *58*, 527-529. [10.1128/JB.58.4.527-529.1 949]
77. Fuchser, J.; Grabley, S.; Noltemeyer, M.; Philipps, S.; Thiericke, R.; Zeeck, A. Secondary metabolites by chemical-screening .28. aspinonene, a new multifunctional fungal metabolite. *Liebigs Annalen Der Chemie* **1994**, *8*, 831-835. [10.1002/jlac.199419940812]
78. Kito, K.; Ookura, R.; Yoshida, S.; Namikoshi, M.; Ooi, T.; Kusumi, T. Pentaketides relating to aspinonene and dihydroaspyrone from a marine-derived fungus, *Aspergillus ostianus*. *J. Nat. Prod.* **2007**, *70*, 2022-2025. [10.1021/np070301n]

79. Ola, A.R.B.; Tawo, B.D.; Belli, H.L.L.; Proksch, P.; Tommy, D.; Hakim, E.H. A new antibacterial polyketide from the endophytic fungi *Aspergillus fumigati*affinis. *Nat. Prod. Commun.* **2018**, *13*, 1573-1574. [10.1177/1934578X1801301202]
80. Zabala, A.O.; Xu, W.; Chooi, Y.H.; Tang, Y. Characterization of a silent azaphilone gene cluster from *Aspergillus niger* ATCC 1015 reveals a hydroxylation-mediated pyran-ring formation. *Chem. Biol.* **2012**, *19*, 1049-1059. [10.1016/j.chembiol.2012.07.004]
81. de Oliveira Filho, J.W.; Islam, M.T.; Ali, E.S.; Uddin, S.J.; Santos, J.V.D.; de Alencar, M.V.O.B.; Gomes, A.L.; Paz, M.F.C.J.; de Brito, M.D.M.; Sousa, J.M.D.E.; et al. A comprehensive review on biological properties of citrinin. *Food Chem. Toxicol.* **2017**, *110*, 130-141. [10.1016/j.fct.2017.10.002]
82. Guo, D.L.; Li, X.H.; Feng, D.; Jin, M.Y.; Cao, Y.M.; Cao, Z.X.; Gu, Y.C.; Geng, Z.; Deng, F.; Deng, Y. Novel polyketides produced by the endophytic fungus *Aspergillus fumigatus* from cordyceps sinensis. *Molecules* **2018**, *23*, 1709. [10.3390/molecules 23071709]
83. Song, Z.; Bakeer, W.; Marshall, J.W.; Yakasai, A.A.; Khalid, R.M.; Collemare, J.; Skellam, E.; Tharreau, D.; Lebrun, M.H.; Lazarus, C.M.; et al. Heterologous expression of the avirulence gene ACE1 from the fungal rice pathogen *Magnaporthe oryzae*. *Chem. Sci.* **2015**, *6*, 4837-4845. [10.1039/c4sc03707c]
84. Grau, M.F.; Entwistle, R.; Chiang, Y.M.; Ahuja, M.; Oakley, C.E.; Akashi, T.; Wang, C.C.C.; Todd, R.B.; Oaldehy, B.R.; et al. Hybrid transcription factor engineering activates the silent secondary metabolite gene cluster for (+)-asperlin in *Aspergillus nidulans*. *ACS Chem. Biol.* **2018**, *13*, 3193-3205. [10.1021/acscchembio.8b00679]
85. Wang, B.; Li, X.J.; Yu, D.; Chen, X.Y.; Tabudravu, J.; Deng, H.; Pan, L. Deletion of the epigenetic regulator GcnE in *Aspergillus niger* FGSC A1279 activates the production of multiple polyketide metabolites. *Microbiol. Res.* **2018**, *217*, 101-107. [10.1016/j.micres.2018.10.004]
86. Yamazaki, H.; Takahashi, K.; Iwakura, N.; Abe, T.; Akaishi, M.; Chiba, S.; Namikoshi, M.; Uchida, R. A new protein tyrosine phosphatase 1B inhibitory alpha-pyrone-type polyketide from Okinawan plant-associated *Aspergillus* sp. TMPU1623. *J. Antibiot. (Tokyo)* **2018**, *71*, 745-748. [10.1038/s41429-018-0054-y]
87. Siriwardane, A.M.; Kumar, N.S.; Jayasinghe, L.; Fujimoto, Y. Chemical investigation of metabolites produced by an endophytic *Aspergillus* sp. isolated from Limonia acidissima. *Nat. Prod. Res.* **2015**, *29*, 1384-1387. [10.1080/14786419.2015.1025 230]
88. Du, L.; Zhu, T.J.; Fang, Y.C.; Liu, H.B.; Gu, Q.Q.; Zhu, W.M. Aspergiolide A, a novel anthraquinone derivative with naphtho[1,2,3-de]chromene-2,7-dione skeleton isolated from a marine-derived fungus *Aspergillus glaucus*. *Tetrahedron* **2007**, *63*, 1085-1088. [10.1016/j.tet.2008.03.012]
89. Du, L.; Ai, J.; Li, D.H.; Zhu, T.J.; Wang, Y.; Knauer, M.; Bruhn, T.; Liu, H.B.; Geng, M.Y.; Gu, Q.Q.; et al. Aspergiolides C and D: spirocyclic aromatic polyketides with potent protein kinase c-Met inhibitory effects. *Chemistry* **2011**, *17*, 1319-1326. [10.1002/chem.201001547]
90. Scherlach, K.; Sarkar, A.; Schroeckh, V.; Dahse, H.M.; Roth, M.; Brakhage, A.A.; Horn, U.; Hertweck, C. Two induced fungal polyketide pathways converge into antiproliferative spiroanthrones. *Chembiochem* **2011**, *12*, 1836-1839. [10.1002/cbic.201100132]
91. Xie, L.; Tang, H.L.; Song, J.W.; Long, J.Y.; Zhang, L.L.; Li, X.F. Chrysophanol: a review of its pharmacology, toxicity and pharmacokinetics. *J. Pharm. Pharmacol.* **2019**, *71*, 1475-1487. [10.1111/jphp.13143]
92. Paranjape, S.R.; Chiang, Y.M.; Sanchez, J.F.; Entwistle, R.; Wang, C.C.C.; Oakley, B.R.; Gamblin, T.C. Inhibition of tau aggregation by three *Aspergillus nidulans* secondary metabolites: 2,omega-dihydroxyemodin, asperthecin, and asperbenzal -dehyde. *Planta Med.* **2014**, *80*, 77-85. [10.1055/s-0033-1360180]
93. Zhang, S.S.; Zhu, A. O.; Bai, X.; Zhu, H.J.; Cao, F. Alkaloids and polyketides from the marine-derived fungus *Aspergillus versicolor*. *Chem. Nat. Compd.* **2020**, *56*, 964-967. [10.1007/s10600-020-03203-y]
94. Frisvad, J.C.; Larsen, T.O. Extrolites of *Aspergillus fumigatus* and other pathogenic species in *Aspergillus* section fumigati. *Front Microbiol.* **2015**, *6*, 1485. [10.3389/fmicb.2015.01485]
95. Hayashi, A.; Fujioka, S.; Nukina, M.; Kawano, T.; Shimada, A.; Kimura, Y. Fumiquinones A and B, nematocidal quinones produced by *Aspergillus fumigatus*. *Biosci. Biotechnol. Biochem.* **2007**, *71*, 1697-1702. [10.1271/bbb.70110]
96. Kong, C.X.; Huang, H.Z.; Xue, Y.; Liu, Y.Q.; Peng, Q.Q.; Liu, Q.; Xu, Q.; Zhu, Q.Y.; Yin, Y.; Zhou, X.S.; et al. Heterologous pathway assembly reveals molecular steps of fungal terreic acid biosynthesis. *Sci. Rep.* **2018**, *8*, 2116. [10.1038/s41598-018- 20514-x]

97. Seshime, Y.; Juvvadi, P.R.; Kitamoto, K.; Ebizuka, Y.; Fujii, I. Identification of csypyrone B1 as the novel product of *Aspergillus oryzae* type III polyketide synthase CsyB. *Bioorg. Med. Chem.* **2010**, *18*, 4542-4546. [10.1016/j.bmc.2010.04.058]
98. Xu, Z.; Xiong, B.; Xu, J. Chemical investigation of secondary metabolites produced by mangrove endophytic fungus *phyllosticta capitalensis*. *Nat. Prod. Res.* **2021**, *35*, 1561-1565. [10.1080/14786419.2019.1656624]
99. Chobot, V.; Opletal, L.; Jahodar, L.; Patel, A.V.; Dacke, C.G.; Blunden, G. Ergosta-4,6,8,22-tetraen-3-one from the edible fungus, *Pleurotus ostreatus* (oyster fungus). *Phytochemistry* **1997**, *45*, 1669-1671. [10.1016/S0031-9422(97)00249-5]
100. Lee, D.Y.; Lee, S.J.; Kwak, H.Y.; Lakoon-Jung.; Heo, J.; Hong, S.; Kim, G.W.; Baek, N.I. Sterols isolated from Nuruk (*Rhizopus oryzae* KSD-815) inhibit the migration of cancer cells. *J. Microbiol. Biotechn.* **2009**, *19*, 1328-1332. [10.4014/jmb.0902.0072]
101. Salendra, L.; Lin, X.P.; Chen, W.H.; Pang, X.Y.; Luo, X.W.; Long, J.Y.; Liao, S.R.; Wang, J.F.; Zhou, X.F.; Liu, Y.H. Cytotoxicity of polyketides and steroids isolated from the sponge-associated fungus *Penicillium citrinum* SCSIO 41017. *Nat. Prod. Res.* **2021**, *35*, 900-908. [10.1080/14786419.2019.1610757]
102. Springer, J.P.; Dorner, J.W.; Cole, R.J.; Cox, R.H. Terretinin, a toxic compound from *Aspergillus terreus*. *J. Org. Chem.* **1979**, *44*, 4852-4854. [10.1021/jo00394a023]
103. Konig, C.C.; Scherlach, K.; Schroeckh, V.; Horn, F.; Nietzsche, S.; Brakhage, A.A.; Hertweck, C. Bacterium induces cryptic meroterpenoid pathway in the pathogenic fungus *Aspergillus fumigatus*. *Chembiochem* **2013**, *14*, 938-942. [10.1002/cbic.201300070]
104. Hamasaki, T.; Kuwano, H.; Isono, K.; Hatsuda, Y.; Fukuyama, K.; Tsukihara, T.; Katsube, Y. A new metabolite, parasiticolide A, from *Aspergillus parasiticus*. *Agric. Biol. Chem.* **2014**, *39*, 749-751. [10.1080/00021369.1975.10861681]
105. Hu, Z.X.; Sun, W.G.; Li, Q.; Li, X.N.; Zhu, H.C.; Huang, J.F.; Liu, J.J.; Wang, J.P.; Xue, Y.B.; Zhang, Y.H. Spiroaspertrione A, a bridged spirocyclic meroterpenoid, as a potent potentiator of oxacillin against methicillin-resistant staphylococcus aureus from *Aspergillus* sp. TJ23. *J. Org. Chem.* **2017**, *82*, 3125-3131. [10.1021/acs.joc.7b00056]
106. Qiao, Y.B.; Zhang, X.T.; He, Y.; Sun, W.G.; Feng, W.Y.; Liu, J.J.; Hu, Z.X.; Xu, Q.Q.; Zhu, H.C.; Zhang, J.W.; et al. Aspermerodione, a novel fungal metabolite with an unusual 2,6-dioxabicyclo[2.2.1]heptane skeleton, as an inhibitor of penicillin-binding protein 2a. *Sci. Rep.* **2018**, *8*, 5454. [10.1038/s41598-018-23817-1]
107. Yan, T.; Guo, Z.K.; Jiang, R.; Wei, W.; Wang, T.; Guo, Y.; Song, Y.C.; Tan, R.X.; Ge, H.M. New flavonol and diterpenoids from the endophytic fungus *Aspergillus* sp. YXf3. *Planta Med.* **2013**, *79*, 348-352. [10.1055/s-0032-1328260]
108. Hawas, U.W.; El-Beih, A.A.; El-Halawany, A.M. Bioactive anthraquinones from endophytic fungus *Aspergillus versicolor* isolated from red sea algae. *Arch. Pharm. Res.* **2012**, *35*, 1749-1756. [10.1007/s12272-012-1006-x]
109. Uchoa, P.K.S.; Pimenta, A.T.A.; Braz, R.; de Oliveira, M.D.F.; Saraiva, N.N.; Rodrigues, B.S.F.; Pfenning, L.H.; Abreu, L.M.; Wilke, D.V.; Florencio, K.G.D.; et al. New cytotoxic furan from the marine sediment-derived fungi *Aspergillus niger*. *Nat. Prod. Res.* **2017**, *31*, 2599-2603. [10.1080/14786419.2017.1283499]
110. Pornpakakul, S.; Liangsakul, J.; Ngamrojanavanich, N.; Roengsumran, S.; Silhanonth, P.; Piapukiew, J.; Sangvichien, E.; Puthong, S.; Petsom, A. Cytotoxic activity of four xanthenes from *Emericella varicolor*, an endophytic fungus isolated from *Croton oblongifolius*. *Arch. Pharm. Res.* **2006**, *29*, 140-144. [10.1007/BF02974275]
111. Andersen, R.; Andersen, R.; Buchi, G.; Kobbe, B.; Demain, A.L. Secalonic acids D and F are toxic metabolites of *Aspergillus aculeatus*. *J. Org. Chem.* **1977**, *42*, 352-353. [10.1021/jo00422a042]
112. Alberts, A.W.; Alberts, A.W.; Chen, J.; Kuron, G.; Hunt, V.; Huff, J.; Hoffman, C.; Rothrock, J.; Lopez, M.; Joshua, H.; Harris, E.; et al. Mevinolin: a highly potent competitive inhibitor of hydroxymethylglutaryl-coenzyme A reductase and a cholesterol-lowering agent. *Proc. Natl. Acad. Sci. U S A.* **1980**, *77*, 3957-3961. [10.1073/pnas.77.7.3957]
113. Tsukamoto, S.; Miura, S.; Yamashita, Y.; Ohta, T. Aspermytin A: a new neurotrophic polyketide isolated from a marine-derived fungus of the genus *Aspergillus*. *Bioorg. Med. Chem. Lett.* **2004**, *14*, 417-420. [10.1016/j.bmcl.2003.10.053]
114. Zhuravleva, O.I.; Afiyatullo, S.S.; Vishchuk, O.S.; Denisenko, V.A.; Slinkina, N.N.; Smetanina, O.F. Decumbenone C, a new cytotoxic decaline derivative from the marine fungus *Aspergillus sulphureus* KMM 4640. *Arch. Pharm. Res.* **2012**, *35*, 1757-1762. [10.1007/s12272-012-1007-9]

115. Zhuravleva, O.I.; Kirichuk, N.N.; Denisenko, V.A.; Dmitrenok, P.S.; Pivkin, M.V.; Afiyatullof, S.S. New kipukasin from marine isolate of the fungus *Aspergillus flavus*. *Chem. Nat. Compd+*. **2016**, 52, 266-268. [10.1007/s10600-016-1610-y]
116. Petersen, L.M.; Hoeck, C.; Frisvad, J.C.; Gotfredsen, C.H.; Larsen, T.O. Dereplication guided discovery of secondary metabolites of mixed biosynthetic origin from *Aspergillus aculeatus*. *Molecules* **2014**, 19, 10898-10921. [10.3390/molecules190810898]
117. Jackson, M.; Karwowski, J.P.; Humphrey, P.E.; Kohl, W.L.; Barlow, G.J.; Tanaka, S.K. Calbistrins, novel antifungal agents produced by *Penicillium restrictum*. I. Production, taxonomy of the producing organism and biological activity. *J. Antibiot. (Tokyo)* **1993**, 46, 34-38. [10.7164/antibiotics.46.34]
118. Fu, Y.; Wu, P.; Xue, J.H.; Wei, X.Y.; Li, H.X. Versicorin, a new lovastatin analogue from the fungus *Aspergillus versicolor* SC0156. *Nat. Prod. Res.* **2015**, 29, 1363-1368. [10.1080/14786419.2015.1026342]
119. Tsukamoto, S.; Yoshida, T.; Hosono, H.; Ohta, T.; Yokosawa, H. Hexylitaconic acid: a new inhibitor of p53-HDM2 interaction isolated from a marine-derived fungus, *Arthrinium* sp. *Bioorg. Med. Chem. Lett.* **2006**, 16, 69-71. [10.1016/j.bmcl.2005.09.052]
120. Kaaniche, F.; Hamed, A.; Abdel-Razek, A.S.; Wibberg, D.; Abdissa, N.; El Euch, I.Z.; Allouche, N.; Mellouli, L.; Shaaban, M.; Sewald, N. Bioactive secondary metabolites from new endophytic fungus *Curvularia* sp. isolated from *Rauwolfia macrophylla*. *PLoS One* **2019**, 14, e0217627. [10.1371/journal.pone.0217627]
121. Arakawa, M.; Someno, T.; Kawada, M.; Ikeda, D. A new terrein glucoside, a novel inhibitor of angiogenin secretion in tumor angiogenesis. *J. Antibiot. (Tokyo)* **2008**, 61, 442-448. [10.1038/ja.2008.60]
122. Singh, S.B.; Jayasuriya, H.; Zink, D.L.; Polishook, J.D.; Dombrowski, A.W.; Zweerink, H. Aspercyclide A-C, three novel fungal metabolites from *Aspergillus* sp. as inhibitors of high-affinity IgE receptor. *Tetrahedron Lett.* **2004**, 45, 7605-7608. [10.1016/j.tetlet.2004.08.116]
123. Xu, Y.Q.; Espinosa-Artiles, P.; Schubert, V.; Xu, Y.M.; Zhang, W.; Lin, M.; Gunatilaka, A.A.L.; Susasmuth, R.; Molnar, I. Characterization of the biosynthetic genes for 10,11-dehydrocurvularin, a heat shock response-modulating anticancer fungal polyketide from *Aspergillus terreus*. *Appl. Environ. Microb.* **2013**, 79, 2038-2047. [10.1128/AEM.03334-12]
124. Santagata, S.; Xu, Y.M.; Wijeratne, E.M.; Kontnik, R.; Rooney, C.; Perley, C.C.; Kwon, H.; Clardy, J.; Kesari, S.; Whitesell, L.; Lindquist, S.; Gunatilaka, A.A.L. Using the heat-shock response to discover anticancer compounds that target protein homeostasis. *ACS Chem. Biol.* **2012**, 7, 340-349. [10.1021/cb200353m]
